# Supplementary material for: Combination immunotherapy induces post-intervention control of HIV
Source: Research Square preprint supplement (doi:10.21203/rs.3.rs-6141479/v1), 2025-03-19
Supplement: Supplementary file 1 [file 2f16bfb908c6109084e135ff.xlsx]

## Sheet: A_Reservoir_measurements
Participant_ID	Timepoint	LLTR_million	Pol_million	Nef_million	Poly_million	TatRev_million	TAR_million	ShearCorrected_Intact_RPP30	3'_defective_RPP30	5'_defective_RPP30
35933	BL	1512.02	35.2929	0	118.881	4.82955	18328.1	0	802.937	0
35933	PreATI	1456.74	86.6776	0	243.257	3.77467	18213.6	5.48488	840.049	0
35933	PreLEF	1086.25	34.442	0	82.5093	1.32469	7306.93	0	879.614	0
35933	PreR	1425.35	42.8956	0	273.586	2.36433	26000.2	0	1357.37	0
42894	BL	342.142	92.2746	57.542	23.8463	4.92477	5186.56	0	235.018	0
42894	PreATI	444.482	139.372	30.1344	5.27352	2.44842	8330.08	0	213.603	2.10966
42894	PreATI	444.482	139.372	30.1344	5.27352	2.44842	8330.08	0
42894	PreATI	444.482	139.372	30.1344	5.27352	2.44842	8330.08		213.603	2.10966
42894	PreATI	444.482	139.372	30.1344	5.27352	2.44842	8330.08
42894	PreLEF	282.999	108.593	15.1372	14.8081	0.987207	6251.18	18.6164	281.404	128.32
42894	PreR	576.03	182.409	28.8015	14.8808	10.8006	7998.9
10227	BL	262.516	28.0496	22.2959	11.1479	0	3089.23	22.2929	209.094	112.589
10227	PreATI	205.988	13.4685	13.9967	6.6022	0	2499.54	32.2168	145.423	96.3852
10227	PreLEF	113.725	14.4052	5.5599	7.58168	0	1453.16	38.0704	86.4075	93.9212
10227	PreR	193.336	21.4157	1.78464	11.0053	0	2597.49	12.6325	49.3784	36.1194
60610	BL	0	0	0	0	0	0	0	0	1.05264
60610	PreATI	0	0	0	0	0	13.7262	0	0	0
60610	PreLEF	0	0	0	0	0	5.08425	0.983631	0	0
47019	BL	94.0567	38.2231	2.60157	13.0078	1.30078	1711.03	0	0	38.9039
47019	PreATI	143.265	35.9464	6.77252	16.4103	1.95361	2198.08	0	0	58.9746
47019	PreLEF	205.528	56.309	1.97081	10.6987	0.844634	2756.15	0	0	46.3452
47019	PreR	202.456	47.2397	0	19.5352	0	3173.76	0	0	39.7856
48758	BL	5.70082	0	5.70082	0	0	1448.86	6.63595	26.6494	51.8961
48758	PreATI	0	0	0	0	0	1479.25	3.35863	20.1612	38.3063
48758	PreLEF	0	0	0	0	0	1641.31	0	17.2145	43.6983
48758	PreR	0	0	5.5462	0	0	724.374	2.71539	9.3489	29.6049
71190	BL	180.115	68.6384	0	27.7474	0	2065.72	20.6367	148.407	80.7786
71190	PreATI	194.441	60.8823	0	24.2254	0	2666.79	31.5791	165.284	137.737
71190	PreLEF	182.408	39.8752	3.39363	24.1796	0	2414.78	13.6996	133.474	88.4465
72210	BL	359.351	0	21.6906	0	0	921.445	0	153.115	0
72210	PreATI	201.334	2.64378	11.592	3.05052	0	292.85	0	165.607	1.3674
72210	PreLEF	385.522	3.21268	9.63804	6.42536	0	526.478	0	148.603	1.40781
72210	PreR	308.367	0	35.1195	0	0	800.361	0	135.458	0
30988	BL	124.191	15.6388	93.833	0	0	428.458	0	59.2984	0
30988	PreLEF	64.7949	6.54494	10.7992	0	2.12711	310.476	0	45.3476	1.16005
30988	PreR	3.97395	0	0	0	0	32.3168	0	64.0542	0
31092	BL	0	0	0	0	0	114.736	6.37545	0	0
31092	PreATI	0	0	0	0	0	134.767	1.87441	0	1.84176
31092	PreLEF	0	0	0	0	0	246.305	0	0	0

## Sheet: B_ICS_frequencies
Participant_ID	Timepoint	CE_IFNg_CD4	CE_IFNg_CD8	Total_IFNg_CD4	Total_IFNg_CD8	Nef_IFNg_CD4	Nef_IFNg_CD8
35933	BL	0.013	0.028	0.156	0.232	0.022	0.038
35933	PostBoost	0.144	0.318			0.008	0.098
35933	PostPrime	0.048	0.196			0.021	0.106
35933	PreATI	0.045	0.212	0.154	0.287
35933	PreR	0.051	0.179	0.215	0.28
42894	BL	0.075	0.0005	0.617	0.817	0.231	0.042
42894	PostBoost	0.344	0.475			0.404	0.055
42894	PostPrime	0.468	0.065			0.428	0.055
42894	PreATI	0.171	0.388	0.764	1.157
42894	PreR	0.051	0.245	0.69836	1.115
42894	PostR1			0.488	0.78996
10227	BL	0.173	0.112	0.342	0.3505	0.093	0.252
10227	PostBoost	1.22	0.216			0.1	0.286
10227	PostPrime	0.297				0.107	0.25
10227	PreATI	0.403	0.005	0.892	0.207
10227	PreR	0.266	0.005	0.686	0.112
10227	PostR1			0.127	0.39168
60610	BL	0.02	0.025	0.253	0.267	0.046	0.031
60610	PostBoost	0.161	0.12			0.011	0.037
60610	PostPrime	0.054	0.055			0.019	0.026
60610	PreATI	0.033	0.038	0.164	0.0225
47019	BL	0.017	0.0005	0.201	0.8455	0.001	0.295
47019	PostBoost	0.358	0.0005			0.002	0.408
47019	PostPrime	0.088	0.0005			0.005	0.548
47019	PreATI	0.099	0.0005	0.353	0.755
47019	PreR	0.04	0.0005	0.2215	0.6425
47019	PostR1			0.0005	0.6345
48758	BL	0.025	0.029	0.1885	0.343	0.062	0.159
48758	PostBoost	0.445	0.125			0.054	0.185
48758	PostPrime	0.13165	0.013			0.05365	0.144
48758	PreATI	0.09515	0.03	0.2386	0.3605
48758	PreR	0.058	0.02254	0.223	0.20716
48758	PostR1			0.0005	0.373
71190	BL	0.054	0.1	0.199	0.475	0.033	0.11
71190	PostBoost	0.295	0.542			0.068	0.142
71190	PostPrime	0.214	0.243			0.032	0.143
71190	PreATI	0.102	0.06	0.1735	0.5215
71190	PreR	0.117	0.08721	0.23921	0.54584
71190	PostR1			0.0005	3.208
72210	BL	0.0005	0.0005	0.0985	1.071	0.016	0.5
72210	PostBoost	0.393	0.093			0.073	0.473
72210	PostPrime	0.146	0.024			0.086	0.536
72210	PreATI	0.174	0.063	0.676	3.354
72210	PreR	0.192	0.06084	0.678	3.47736
72210	PostR1			0.262	1.603
30988	BL	0.037	0.083	0.142	0.333	0.015	0.107
30988	PostBoost	0.108	0.219			0.078	0.142
30988	PreR	0.048	0.059	0.1905	0.2055
30988	PostR1			0.084	0.2435
31092	BL	0.0005	0.0005	0.093	0.779	0.003	0.01
31092	PostBoost	0.078	0.027			0.0005	0.007
31092	PostPrime	0.051	0.048			0.006	0.013
31092	PreATI	0.0005	0.002	0.017	0.1625
31092	PostR1			0.0905	0.1795

## Sheet: C_CTV_frequencies
Participant_ID	Timepoint	CE_CTVlo_of_CD8	CE_CTVlo_of_CD4	Total_HIV_CTVlo_of_CD8	Total_HIV_CTVlo_of_CD4
35933	BL	4.14	0	11.7	2.15
35933	PreATI	2.8	0	23.9	4.7
42894	BL	8.6	1.69	44	1.9
42894	PreATI	24.7	0	24.6	2.25
10227	BL	0	0	14.55	0
10227	PreATI	15.7	0.6	71.7	3.77
60610	BL	1.09	0	4.72	1.75
60610	PreATI	9.9	3.24	42.8	0.06
47019	BL	1.92	1.15	23.84	1.75
47019	PreATI	1.3	0	6.46	0.06
48758	BL
48758	PreATI	3.8	0	54.8	0
71190	BL	6.5	1.99	13.4	2.52
71190	PreATI	17.3	5.51	20.7	7.85
72210	BL	7.8	6.31	23.55	1.28
72210	PreATI	10.3	6.99	28.46	1.41
30988	BL	3.2	1.46	1.12	0.21
30988	PreATI
31092	BL	5.49	1.2	7.95	1.54
31092	PreATI	7.97	2.2	1.29	4.89

## Sheet: D_CyTOF_manually_gated_features
Participant_ID	Timepoint	CD4	CD8	gdTCR	B	Basophils	pDCs	CD56hiNK	CD56midNK	CD14negCD16posmono	cDCs	CD14posCD16negmono	CD14posCD16posmono	nnCD8	TCM	TEM	TEMRA	TN	nngd	nCD4	Tfh	Tctl	Th1	oCD4	Treg	Ttm	Tscm	cDCother	cDC1	cDC2	CD27negIgDneg	naiveBcells	ABC	ASC	IgDnegIgMneg	IgDnegIgMpos	IgDposIgMpos	plasmablast	transitionalBcells	CD27negIgDneg_BDCA1	CD27negIgDneg_CCR2	CD27negIgDneg_CD11c	CD27negIgDneg_CD20	CD27negIgDneg_CD21	CD27negIgDneg_CD24	CD27negIgDneg_CD38	CD27negIgDneg_CD40	CD27negIgDneg_CD71	CD27negIgDneg_CX3CR1
10227	BL	23.8558	29.0396	6.71822	7.18605	0.0663919	0.337623	1.11419	8.65171	2.43447	1.04308	10.4251	0.867185	85.4501	4.53807	19.2553	45.3849	13.404	99.4905	15.5408	1.51391	14.8163	20.4333	42.4674	4.57071	16.2719	1.1475	74.4193	19.9698	5.4902	16.6433	68.513	0.954549	0.0875733	6.08635	0.420352	1.66389	0.153253	3.95394	1.789	1.94686	7.73481	99.0792	60.8524	33.7017	31.1234	91.5549	2.15733	1.31544
10227	PostR1	22.0743	27.7114	4.6238	5.58611	0.3962	0.293602	1.63869	4.80081	2.24104	1.10959	13.2132	0.715691	94.2121	1.69371	15.2618	41.5218	4.88209	98.553	15.1381	1.64037	14.6037	19.6856	42.8289	5.19527	35.7348	0.895696	77.3246	17.3004	4.92568	12.6815	64.1182	3.12403	0.391363	8.36967	0.508085	1.71307	0.511518	7.45649	3.1673	3.43801	17.0818	96.2913	65.8094	29.1283	33.4055	90.823	7.33622	3.817
10227	PreATI	30.126	25.3005	4.66685	8.0711	0.119423	0.406898	1.00545	5.20994	1.10485	1.24751	12.2616	0.589609	81.1234	7.12286	20.1439	37.511	17.6568	99.4588	17.171	1.75119	9.76841	18.6098	47.5935	4.50466	16.3457	1.22224	69.1602	22.4706	8.02522	15.3236	70.9343	0.908165	0.101892	5.44013	0.194923	1.09866	0.168343	4.4788	1.67679	1.9948	7.63226	98.5256	59.7572	32.9575	34.085	92.4834	2.573	0.954033
10227	PreR	29.5754	16.8289	2.62477	9.36878	0.470566	0.306405	1.25398	2.80105	1.34788	1.57264	21.3538	0.846374	77.262	4.93023	15.3317	37.8982	20.856	98.0006	19.2996	1.73451	8.51285	13.1006	50.8003	5.71811	19.1019	1.84611	76.8274	18.0489	4.68643	12.3504	68.9785	1.90588	0.362369	7.1671	0.307325	1.5114	0.493097	4.75666	2.41411	3.63974	11.532	96.3417	70.1393	31.4578	32.9619	91.8292	6.07242	3.24977
30988	BL	23.5481	26.5213	6.75417	6.18394	0.125839	0.188639	1.18525	5.63775	1.08395	1.04136	15.4482	0.28777	81.0289	8.35926	27.2272	24.6011	18.2248	99.4044	11.1936	2.29662	11.7706	23.3897	44.9764	5.51033	20.8414	0.756624	67.0518	19.9861	12.4769	21.4972	50.1576	1.64196	0.291817	14.906	0.941598	2.21392	0.501926	3.98039	2.57014	1.93665	3.61991	97.8281	69.6109	41.629	34.1176	88.0181	1.93665	1.14027
30988	PostR1	21.9314	25.6382	7.94856	6.32106	0.432195	0.35295	1.10381	3.29064	0.0725008	1.31569	5.78208	0.0871134	82.8728	7.99928	34.895	19.7877	16.1598	98.3386	15.8856	0.403162	10.676	18.2784	50.8299	3.00016	20.1908	0.936086	84.622	10.7646	4.18625	18.8584	56.4684	1.60043	0.0800213	14.2349	0.506802	0.951365	0.28452	2.16947	1.50872	2.876	3.9604	92.8807	64.5922	28.43	32.1075	77.322	1.93305	1.9802
30988	PreR	20.9503	21.3965	7.00762	4.04339	0.536819	0.326986	1.58538	6.9969	2.59122	1.43513	17.3285	0.743442	86.4026	5.51701	26.4421	27.4371	12.2882	98.485	12.5887	2.23295	15.6306	20.4014	43.5144	4.43381	27.0064	1.29088	74.4758	16.5222	8.5267	22.3854	45.9069	3.92935	1.78607	16.9131	0.778924	1.24529	2.29708	4.57928	2.1055	1.88387	3.9672	93.0629	73.8697	24.6676	31.1613	87.5443	5.49645	2.59309
31092	BL	36.9565	19.7702	1.05336	8.59716	0.0548755	0.168462	0.74849	8.506	0.227468	0.393865	6.91933	0.226288	81.4693	4.54398	34.5568	26.1975	18.1893	97.5295	23.8754	0.584902	7.54991	16.5489	47.6726	3.01895	16.171	0.335743	70.6367	23.221	6.06742	22.8243	58.1743	1.43102	0.109815	11.0913	0.425532	1.85655	0.1407	0.109815	2.22523	3.05217	3.69869	97.6695	67.4034	41.272	21.711	94.873	1.93956	0.511201
31092	PostR1	30.3982	16.1814	1.05307	7.4687	0.0515262	0.144158	0.612815	4.45934	0.261105	0.954972	17.0983	0.207842	91.1201	1.47448	32.0567	45.0344	8.53114	96.7996	23.8704	0.828002	9.23562	14.904	47.5446	2.74358	12.5545	0.337212	83.0252	14.0346	2.30373	22.8208	57.9939	2.53091	0.33332	11.8212	0.364327	0.961203	0.410837	0.499981	2.93818	5.5197	7.0822	92.7649	65.591	33.2201	22.4694	91.9667	5.77446	1.71535
31092	PreATI	30.9034	28.5777	1.32058	6.46619	0.0354419	0.118984	0.652582	5.54329	0.275097	0.593512	10.8011	0.215465	89.3705	2.84067	35.7261	39.533	10.356	98.5792	21.2713	0.924006	10.9834	20.1751	42.8284	3.02063	11.2707	0.27575	71.4692	23.6019	4.69194	25.1305	55.2854	2.1968	0.156603	11.841	0.43936	1.51818	0.221855	0.0565512	3.58317	4.25827	5.46997	97.7843	63.9259	43.5347	24.8745	94.53	3.66972	0.623161
35933	BL	32.116	21.6268	3.42298	6.0339	0.231109	0.369888	0.166928	7.2038	1.90799	1.31966	19.456	0.850967	76.5992	7.97099	25.6844	32.1208	22.8619	98.4038	42.3125	0.614232	13.2576	12.3839	27.4829	3.33459	10.8231	0.542781	57.8712	31.6766	10.2176	26.9466	59.5241	1.01703	0.153954	5.45836	0.713786	3.61092	0.191276	1.41358	2.30263	2.57964	9.29709	98.9612	66.153	44.7368	22.8012	96.9875	2.31994	1.67936
35933	PreATI	35.46	25.053	3.33207	5.83597	0.0611974	0.306377	0.213996	3.83672	0.606517	1.18029	12.3396	0.405384	81.683	10.5581	34.2579	23.6778	17.8391	98.9642	27.6313	0.798087	16.6218	16.4864	34.7823	2.96346	13.1891	0.473044	73.2827	17.6684	8.65258	24.4857	62.9976	1.04194	0.126904	5.09618	0.654555	2.19744	0.207053	2.45124	2.72777	2.5641	7.96508	98.5816	65.1391	45.7174	31.8603	96.8631	2.83688	1.69122
35933	PreR	37.4049	23.3861	3.01011	7.6571	0.534478	0.383377	0.260311	5.88969	0.668138	0.852165	11.1562	0.629344	67.3208	3.77851	22.9321	28.4649	32.2412	97.7194	43.892	1.08728	12.2338	10.1487	27.1109	4.60434	11.2028	1.15479	46.5953	42.7888	10.176	16.9831	66.0507	1.29215	0.131982	5.94985	0.700358	3.83387	0.219261	2.87168	5.51517	4.85084	11.3813	98.3956	76.5355	53.986	36.7511	98.0321	5.26448	5.45249
42894	BL	27.7655	20.4847	1.91905	12.727	0.257453	0.428209	0.268456	3.99207	1.64748	2.24293	16.5014	0.506545	84.2727	6.34114	17.7081	36.8649	15.0054	97.2689	30.0215	1.62073	2.97753	10.5577	49.8914	4.4632	23.3586	0.73033	62.0818	27.1068	10.5072	13.8214	74.2816	1.12037	0.0968222	5.85428	0.345793	0.738269	0.145233	3.36111	3.40255	2.37678	4.24068	98.9992	75.3315	34.2507	40.3177	96.047	2.28922	1.18839
42894	PostR1	34.3057	22.3964	3.07932	8.41054	0.0358867	0.18759	0.373548	1.5366	0.0701422	2.74697	2.50228	0.0391492	84.4823	5.04549	32.2077	32.6519	15.0574	98.7212	28.9669	0.982553	4.66024	10.1056	48.8062	4.92654	13.2521	1.03931	77.9097	14.3112	7.48219	27.4244	64.5074	1.08611	0.193949	5.04267	0.155159	0.135764	0.232739	0.775795	2.54597	6.01132	4.59689	97.5248	57.4257	20.0141	39.7454	93.7765	2.75813	2.40453
42894	PreATI	24.7396	26.9905	3.0933	12.6985	0.16726	0.302396	0.303458	7.62283	1.41614	1.39331	10.3109	0.413372	90.2308	3.43907	22.1573	45.1945	9.33016	98.2956	28.98	1.80813	4.45173	12.6945	47.6562	3.88599	19.4399	0.444252	66.5587	22.8468	10.0991	15.438	73.0838	1.07255	0.127535	5.53209	0.309429	0.790299	0.179803	3.13193	3.1961	2.69502	5.33586	99.3229	71.7633	33.0986	40.818	95.4902	2.87107	1.16468
42894	PreR	23.2675	26.2481	3.3451	13.7795	0.205508	0.39703	0.446951	6.63958	1.36008	1.3292	10.1194	0.446951	84.93	6.57245	26.6132	29.1085	13.8163	98.532	35.2549	1.86371	5.18154	8.28653	42.318	5.95958	21.2608	1.85923	54.3621	32.3835	12.9622	9.25289	71.7846	2.17367	0.243868	7.27516	0.339724	0.920496	0.322808	7.98139	7.35832	6.41377	8.79037	97.7757	79.0676	44.6374	59.3541	97.4406	8.95795	3.80865
47019	BL	27.0466	18.9372	0.179545	9.80693	0.260431	0.0974368	0.254261	14.6525	0.72422	0.891328	18.6847	0.479729	42.5329	4.03696	8.92303	21.2634	56.6705	78.0063	51.0698	0.834536	2.62178	7.8392	33.3856	3.70521	8.30946	0.799592	70.5509	21.171	7.8454	24.8309	66.1328	0.54003	0.262151	3.67535	0.346039	1.2793	0.406334	1.31337	2.18539	1.2141	5.42652	99.1765	63.1546	41.5857	22.519	93.2221	1.28801	1.43581
47019	PostR1	25.926	15.5746	0.184046	9.87981	0.21684	0.113878	0.598718	14.4125	0.623762	1.07906	17.3654	0.491047	31.4403	7.0785	6.42321	11.9181	68.7713	80.7116	49.3307	1.60988	5.58872	7.30495	30.4362	4.9001	5.44027	1.01706	66.6336	25.2926	7.63737	14.9301	69.3489	1.30213	0.0909977	5.11104	0.630484	2.43961	0.175496	3.9324	5.41286	2.62661	14.7148	97.4459	67.2471	41.4309	32.8254	93.789	4.80337	4.80337
47019	PreATI	22.0006	15.7681	0.169579	8.83585	0.212146	0.131636	0.312247	19.4582	1.88877	1.0077	20.5486	0.870087	59.9378	4.38321	14.7803	28.2453	39.507	86.8919	40.842	1.91667	5.42711	10.967	35.8278	4.30008	12.5291	0.559528	74.8933	16.5955	8.17923	25.678	62.9147	1.17886	0.246046	5.04799	0.40557	1.65743	0.416385	1.70069	2.54817	1.50574	9.01337	98.7996	62.883	35.4744	21.7648	91.8606	2.843	1.77951
47019	PreR	33.163	19.5682	0.21862	9.44456	0.0653584	0.148002	0.332194	18.7233	0.299784	1.08733	5.89846	0.420238	55.0154	3.04582	7.99317	27.7982	43.6307	76.2125	58.3378	0.82822	4.62981	7.55751	23.4703	4.27965	15.5235	1.88593	71.0383	22.5037	6.11028	16.9917	74.0578	0.394624	0.0343151	2.88247	0.268802	1.02373	0.0514727	2.78524	3.97173	3.46685	8.91956	97.6102	65.3989	43.0158	30.7977	93.7731	2.32245	3.0966
48758	BL	20.5245	26.8132	3.06814	4.91471	0.425474	0.30171	0.759458	13.7839	0.384318	1.04251	16.8905	0.390536	54.7425	5.03569	13.7807	27.4465	44.5269	97.8078	37.5882	0.697134	5.60153	10.4951	40.0859	4.99545	8.47957	0.734764	64.2431	29.3667	6.16302	25.7425	50.8043	1.95795	0.301223	11.4103	0.301223	3.83758	0.481957	0.542201	2.15305	3.79125	6.01451	98.4554	69.2488	52.8668	26.3515	93.611	2.17646	0.795694
48758	PostR1	23.3818	20.4706	1.56082	5.99306	0.672336	0.544443	0.901628	6.88432	0.501214	1.68791	15.7759	0.332881	46.0008	2.59445	7.58506	24.3749	53.2185	96.6621	39.5717	0.720263	6.83602	11.0345	35.2929	5.57427	11.0791	1.55709	71.8282	22.8845	4.94512	15.2839	62.0762	2.38997	0.325755	9.06462	0.375615	3.37056	0.46204	2.77224	4.13223	6.78556	10.8525	95.9765	71.7921	51.4789	37.712	93.1927	7.13354	2.91431
48758	PreATI	18.6423	22.4051	3.27359	3.58657	0.37912	0.355379	0.756929	16.0397	0.335863	0.720809	17.4777	0.602252	57.2292	2.85004	13.063	33.0039	41.9676	97.9811	42.6439	0.562298	6.34938	10.0384	34.7303	5.18074	8.31225	0.809752	60.4365	31.1376	8.10265	23.1919	49.6893	2.16853	0.739086	9.94924	0.418274	3.55736	1.02741	5.12487	2.27631	3.72964	5.65575	98.2665	75.8711	60.8475	31.7633	95.1497	3.15181	1.34828
48758	PreR	21.1072	22.894	1.66685	6.58105	2.6341	0.710149	0.460002	6.3309	0.23168	1.46059	15.4688	0.527155	42.4323	4.19761	7.81578	16.7272	57.1281	96.1798	39.7693	0.0709849	3.83319	4.77374	46.5839	3.33629	13.2888	1.35702	75.977	20.4598	2.75862	19.6684	58.9031	1.40306	0.204082	8.85204	0.255102	2.47449	0.331633	1.86224	2.33463	6.87419	6.61479	95.3307	71.2062	57.0687	37.6135	95.8495	4.02075	1.81582
60610	BL	23.7941	19.8568	4.77644	6.47722	0.120345	0.354916	1.50227	7.55591	1.84937	1.68993	17.5558	0.545293	82.3621	5.85458	22.4414	24.284	16.9034	99.1344	26.2861	0.950971	11.5573	19.4173	37.0369	3.98508	29.7821	0.743054	82.7399	13.8202	3.33937	19.7869	58.0801	1.29114	0.0944733	8.03023	1.11793	5.47945	0.125964	0.761035	3.20955	3.0504	5.27851	98.1432	58.0637	50.7692	24.748	94.3501	1.29973	2.04244
60610	PostR1	24.6062	13.9143	5.11979	5.60861	0.442118	0.470355	1.19361	14.2809	3.78593	1.22371	12.7252	0.436759	87.8871	2.41642	24.0609	38.5239	11.3727	98.1937	27.3217	0.850207	15.1738	16.0475	35.5142	4.13157	22.8858	0.726314	83.6449	11.8073	4.10982	11.5542	66.3812	1.78604	0.0514498	6.07475	0.768072	4.36956	0.128624	3.35159	3.94402	3.18066	8.07888	93.7341	70.1018	45.07	33.4288	94.4338	5.34351	2.57634
60610	PreATI	28.0631	15.5144	2.89009	6.23494	0.574136	0.355989	0.859578	4.42873	1.52903	1.66637	25.4721	0.637929	74.5331	7.21391	21.5783	25.1914	24.8403	98.2594	29.9103	0.783335	7.61606	15.9296	40.3981	4.56588	20.5495	0.63143	81.8045	13.3764	4.66897	12.9559	70.6135	0.417285	0.0401236	3.66328	0.633953	2.39939	0.0802472	5.78181	2.3227	3.15887	5.51254	98.2657	60.2663	44.7507	28.8015	92.908	0.805203	1.76525
71190	BL	28.2223	14.0241	1.69881	9.80515	0.241326	0.186808	0.179946	6.30878	0.235226	1.64773	17.6282	0.245519	78.9699	11.3743	35.1651	19.4082	20.2361	98.8788	19.992	0.529812	3.64149	10.7384	62.6341	1.88535	13.0224	0.793982	78.7598	17.677	3.44748	36.9454	45.8066	1.14701	0.108869	11.7267	0.357712	0.944827	0.217738	1.13146	2.28373	1.47337	11.0924	99.0213	57.651	40.8967	22.0059	92.0543	2.38897	1.19975
71190	PostR1	22.9347	17.3456	1.71465	9.55807	0.579417	0.222221	0.174236	5.23913	1.09828	2.3518	18.3992	0.33872	88.178	2.04983	14.8529	52.0514	11.3961	99.0273	27.967	3.40088	6.52227	10.7345	43.6553	6.65345	18.3975	0.858218	70.9547	22.0513	6.63393	23.7919	47.3905	4.34117	0.335588	19.9608	0.418814	1.32356	0.504725	1.0363	3.82532	2.18912	23.1663	97.2467	58.4518	36.1544	27.9057	94.2902	5.05529	3.92688
71190	PreATI	29.4124	21.361	1.77386	8.83947	0.168928	0.116258	0.274052	7.31249	1.09578	1.31031	15.503	0.359051	88.3963	7.26263	46.0701	20.489	11.1223	99.2439	17.4658	3.53766	5.84685	17.5316	50.2893	4.65665	14.5745	0.486309	72.1895	20.3268	7.15686	29.8697	44.2087	3.93111	0.42145	18.1296	0.627331	1.16747	0.624909	1.36366	2.72462	1.84074	20.0373	98.7026	57.0954	40.6098	23.7188	93.0506	3.38145	3.17061
71190	PreR	25.2824	15.0781	1.85447	8.17495	0.652534	0.280341	0.254223	6.32553	2.27603	2.51502	20.6989	1.22954	88.8623	4.90562	16.0134	41.2388	10.2198	99.0397	26.893	3.88363	6.73846	10.7032	43.4478	7.11732	25.5849	1.50355	65.8416	26.2657	7.5119	24.588	49.0934	2.71839	0.260923	17.165	0.593733	1.42443	0.372747	1.81048	5.40336	2.49053	27.9264	97.7802	58.0184	35.6037	25.3059	95.1705	4.79697	5.81483
72210	BL	31.2396	21.5332	2.31054	5.38998	0.307723	0.245684	0.422904	8.90495	0.754108	1.14513	16.209	0.436251	87.3533	9.50984	31.5569	20.1816	12.0935	99.1294	23.7478	0.666313	6.88757	15.9344	48.2801	3.82153	26.105	0.559059	66.0263	26.5487	7.18757	23.9464	65.1442	0.531939	0.100885	3.86115	0.334755	0.568625	0.151328	4.39767	1.57028	1.64688	2.77671	98.6595	61.1069	39.5825	33.8185	94.4083	1.18728	0.919188
72210	PostR1	25.3889	17.5447	2.4452	9.5199	1.05411	0.281723	0.524709	6.49724	0.218335	2.28548	8.25684	0.177251	93.2794	9.28715	32.0783	17.6205	6.28765	98.0639	19.8604	0.0346906	11.2788	18.2603	47.0795	2.52808	34.2934	0.432982	76.7334	20.1849	2.56805	15.9309	71.2947	1.07275	0.0739827	3.79778	0.246609	0.295931	0.0739827	6.20222	1.39319	1.70279	6.42415	94.5046	61.5325	22.9102	35.5263	87.6161	2.32198	2.08978
72210	PreATI	26.6984	22.3421	2.59871	4.32984	0.175649	0.235147	0.678419	12.4145	1.11245	1.0904	16.2081	0.553971	91.4925	5.60722	33.9561	20.6344	8.07525	99.3152	22.8046	0.861674	9.75848	19.031	42.342	4.46841	31.2948	0.432226	68.1957	22.4783	9.06522	17.7269	63.4512	0.766451	0.739078	3.51473	0.328479	0.536516	0.903318	11.9512	2.81038	2.25448	5.65164	97.1587	59.6973	38.7276	37.6158	92.9895	2.47066	1.38975
72210	PreR	25.8808	20.7184	2.9966	6.62716	0.467977	0.36474	0.615388	12.2229	2.67989	1.57658	15.4011	0.792583	90.2027	5.47893	24.311	25.3472	8.91282	98.2977	25.349	1.04485	11.8301	16.4248	39.8123	4.58795	35.0656	0.868931	57.3807	33.4134	8.61351	12.889	71.2855	0.895068	0.228528	3.71739	0.31613	0.449438	0.262807	8.86688	3.36879	2.27541	4.46217	95.8333	73.3452	27.6005	43.4102	94.5331	3.36879	2.15721
[truncated: 356 more columns]

## Sheet: E_CyTOF_nnCD8_cluster_frequenci
Participant_ID	Timepoint	NonNaiveCD8s_c1	NonNaiveCD8s_c2	NonNaiveCD8s_c3	NonNaiveCD8s_c4	NonNaiveCD8s_c5	NonNaiveCD8s_c6	NonNaiveCD8s_c7	NonNaiveCD8s_c8	NonNaiveCD8s_c9	NonNaiveCD8s_c10	NonNaiveCD8s_c11	NonNaiveCD8s_c12	NonNaiveCD8s_c13	NonNaiveCD8s_c14	NonNaiveCD8s_c15	NonNaiveCD8s_c16	NonNaiveCD8s_c17	NonNaiveCD8s_c18	NonNaiveCD8s_c19	NonNaiveCD8s_c20
10227	BL	5.80814	23.751	13.9053	0.31782	0.430161	21.1691	9.11884	0.452245	0.788309	1.90692	14.0955	0.241966	0.684609	0.525219	4.25072	1.35866	0.0412878	0.180514	0.831517	0.142107
10227	PostR1	3.80682	14.964	11.2744	0.187192	2.83412	12.7238	6.2342	7.11943	17.5375	1.11703	7.09318	3.03356	0.607937	6.98822	2.42213	0.887851	0.0516091	0.209935	0.53446	0.372635
10227	PreATI	5.14455	27.0202	11.1686	0.261587	0.428462	18.6509	9.14804	0.375844	0.862937	1.98446	13.6792	0.248057	1.01177	0.942616	5.39712	2.10322	0.0225506	0.224003	1.14407	0.181908
10227	PreR	4.7647	15.5682	12.8275	0.183328	0.999138	16.0375	13.3976	1.1843	1.64445	1.81312	15.2529	0.606816	1.52529	0.936807	6.61815	2.90575	0.507819	0.526152	1.50146	1.19897
30988	BL	1.30747	23.2162	12.3342	0.212202	0.761494	12.2193	9.04067	1.38594	1.9485	1.6943	17.752	0.53382	2.16401	0.543767	7.25243	3.53227	0.0895225	1.24558	2.19275	0.573607
30988	PostR1	0.571182	22.1953	17.157	0.10777	0.926824	11.0195	8.52463	6.51471	2.90441	0.94299	8.9126	1.07231	1.08848	3.39476	4.40241	5.52861	0.484966	0.722061	3.05529	0.474189
30988	PostR2	1.12922	19.3984	10.9115	0.206661	2.22482	8.74303	7.58217	7.01361	10.8502	1.4308	10.6771	3.3659	1.54155	3.15133	5.43547	2.76965	0.155243	0.839497	1.63648	0.937389
30988	PreR	1.63667	25.7042	9.64233	0.30191	1.75368	9.11652	7.5463	4.25707	7.22128	1.37232	12.9995	2.49473	1.602	1.38965	5.73339	2.58862	0.221015	1.10652	2.4615	0.850836
31092	BL	0.546583	22.501	15.553	0.288064	0.888812	15.068	14.2284	1.06854	0.64999	0.753398	15.8878	0.327457	0.544121	0.408706	5.34765	4.23971	0.0246208	0.285602	0.888812	0.499803
31092	PostR1	0.619617	33.037	25.1136	0.136163	3.55094	10.4585	8.92554	1.56664	0.884292	0.667044	8.08255	0.55383	0.339642	0.497223	2.68654	2.08681	0.0244787	0.123923	0.471215	0.174411
31092	PostR2	0.418239	31.7111	27.131	0.0863754	1.78888	11.4266	5.97809	2.82993	3.5664	0.402328	6.3145	1.47066	0.181843	0.809201	3.02769	2.04801	0.118198	0.113652	0.361413	0.215939
31092	PreATI	0.561111	36.6643	19.3733	0.190778	3.58488	13.2347	7.57625	1.58982	0.899025	0.615975	8.9915	0.870346	0.278062	0.634679	2.57238	1.55241	0.0249383	0.144642	0.52121	0.119704
35933	BL	6.71112	27.5563	15.1971	0.365844	0.534185	15.1109	7.55812	0.453328	0.320776	1.59195	12.5978	0.288964	1.77222	0.18955	6.66737	2.05721	0.060974	0.124599	0.703852	0.137854
35933	PostR2	2.40677	15.9123	11.5329	0.145175	0.963564	13.4244	5.32451	10.4455	18.433	1.28665	6.72075	3.16823	0.738685	5.16652	2.16909	1.16567	0.0483917	0.089667	0.259038	0.599203
35933	PreATI	4.29655	29.7217	12.9536	0.235577	0.148211	15.8414	9.12353	0.659927	0.790976	1.20441	13.8257	0.157571	1.20441	0.2855	6.05947	2.34953	0.0936067	0.13885	0.528878	0.380667
35933	PreR	4.8695	23.466	11.5544	0.67996	0.503007	14.5298	11.0547	0.732391	1.15675	1.39924	15.3786	0.337522	2.02513	0.696345	7.68764	2.60023	0.0704537	0.278538	0.702898	0.276899
42894	BL	3.97382	26.3478	14.1021	0.308162	0.363925	20.4664	5.92258	0.476917	0.918616	1.93995	9.79074	0.136472	1.83283	0.626596	5.76703	2.78813	0.0117395	0.936225	2.83656	0.453438
42894	PostR1	2.68704	28.7526	22.8875	0.115938	0.340994	15.4129	5.98104	0.804747	0.879765	0.702448	4.61706	0.395553	1.08436	1.439	4.6307	6.00832	0.0409193	0.763827	2.02551	0.429653
42894	PostR2	4.26074	30.5839	14.3103	0.623458	0.965697	12.3843	3.28178	3.36933	8.56127	0.639376	4.19441	1.25222	0.498766	4.52604	2.74587	2.7724	0.0477542	1.00814	3.26586	0.708354
42894	PreATI	4.2824	30.678	17.8162	0.394983	3.68749	18.0015	4.15854	1.20446	1.04256	1.49996	5.78724	0.534446	1.16252	1.63942	3.31786	1.93493	0.014629	0.477881	2.11145	0.253569
42894	PreR	4.4794	33.928	15.7437	0.528312	0.471151	19.7433	5.08219	0.271951	0.649564	1.38054	6.72949	0.0987338	1.25756	1.25582	3.6826	1.9435	0.0190539	0.552563	1.88287	0.299666
47019	BL	2.3568	16.1007	11.4067	1.00936	0.440982	12.0829	11.6419	2.05792	2.88108	1.74433	15.3903	1.18575	1.56304	0.803567	11.3969	4.37062	0.200892	0.837866	1.45034	1.07796
47019	PostR1	1.98257	14.9539	8.68742	1.01121	0.488169	11.9701	9.75342	3.47696	8.38356	1.26027	13.1009	2.28144	2.20672	2.82939	10.7746	3.52677	0.129514	1.04608	1.05106	1.08593
47019	PostR2	1.3814	14.4232	10.1238	1.06709	0.93904	11.4276	9.73575	4.7146	10.3411	1.29603	10.3023	3.79884	1.4396	4.66416	7.90423	3.51558	0.0271623	0.849792	0.873074	1.17574
47019	PreATI	2.78806	22.8864	11.5817	1.27268	0.700128	13.2931	8.99586	2.57958	5.58857	1.82033	10.4459	1.58696	1.55895	1.9977	7.12574	3.34817	0.0809036	0.659676	0.725021	0.96462
47019	PreR	1.73061	17.1529	11.4863	2.27429	0.482426	15.2002	10.3224	0.849989	2.12114	1.64637	14.6948	0.71981	2.13646	1.38602	10.935	3.86706	0.0765755	1.18692	1.00314	0.727468
48758	BL	4.63204	27.8219	14.642	0.705613	0.464052	13.9978	9.49081	0.824275	0.957769	3.43483	13.9555	0.241561	0.57	0.396245	3.99636	2.29695	0.0275465	0.50855	0.688661	0.347509
48758	PostR1	2.38355	17.5577	12.8871	0.295846	0.862358	19.9329	11.1687	2.76752	4.0747	1.88418	14.8217	0.872849	1.29039	2.2136	3.71171	1.76248	0.0734368	0.30214	0.677717	0.459505
48758	PostR2	2.49825	21.3867	9.98045	0.588246	3.58686	12.7154	5.94523	5.90219	14.6201	1.61768	6.20707	3.01476	0.371241	5.5148	2.81569	1.2554	0.0251081	0.364067	0.634875	0.955899
48758	PreATI	4.93211	33.9058	16.1137	1.07503	0.715384	15.7463	6.56876	0.747961	0.857418	2.82766	10.0219	0.185036	0.551198	0.551198	2.69083	1.32261	0.0247583	0.319252	0.60332	0.239764
48758	PreR	1.07431	20.7252	17.7708	0.49239	0.223814	9.08684	17.7708	1.79051	0.895255	1.43241	11.0116	0.671441	1.47717	0.716204	2.73053	9.57923	0.0895255	0.760967	1.34288	0.358102
60610	BL	3.5182	14.7842	10.3678	0.336167	0.277471	19.1277	11.4866	1.77866	2.90634	1.62036	19.3536	0.334389	1.38024	1.55811	8.14983	2.19843	0.0889332	0.0942691	0.268578	0.369962
60610	PostR1	5.9149	21.9728	15.7694	0.518406	0.269508	19.0114	10.7486	0.388408	0.596087	1.80887	12.3117	0.212435	1.54571	0.778401	5.78966	1.77558	0.0507308	0.0729256	0.233045	0.231459
60610	PostR2	4.37371	16.0268	11.8877	0.252232	0.118549	15.7494	15.5426	0.572567	0.754174	2.17172	18.3575	0.219442	1.82364	0.403572	8.33628	2.53746	0.136205	0.110982	0.411139	0.214397
60610	PreATI	5.13152	18.9184	9.07884	0.340905	0.0825349	15.6386	11.9676	0.373201	0.434205	1.58611	18.1541	0.13995	2.82413	0.448559	10.098	3.68895	0.0107654	0.204543	0.51674	0.362436
71190	BL	0.555594	27.6494	15.4846	0.209205	0.291515	10.1516	13.564	0.826531	0.548734	1.7731	12.3843	0.277797	1.91028	0.229783	6.22814	5.35359	0.0205775	0.102888	2.23952	0.198916
71190	PostR1	0.690175	27.81	7.89932	0.210726	2.16139	5.87519	5.87712	5.87132	15.0505	2.06086	9.05734	3.59394	0.850636	6.20578	4.00959	1.21022	0.164327	0.108263	0.730774	0.56258
71190	PostR2	0.68328	33.7976	10.4904	0.2628	2.05757	8.04631	6.52208	3.5679	9.31239	2.92945	8.7636	1.63091	0.793037	4.09195	4.07804	1.37738	0.380287	0.122125	0.559609	0.533329
71190	PreATI	0.761937	38.6768	11.6551	0.191906	0.425036	6.27603	8.0174	3.84949	3.28514	1.83235	8.33866	1.14433	1.0235	0.695126	5.49419	2.24032	4.58157	0.0710762	0.564345	0.875659
71190	PreR	1.18314	40.5836	11.1063	0.272883	0.947295	7.54132	7.85124	0.91026	2.15188	2.48714	13.192	0.506783	1.13831	0.812802	6.25877	1.66069	0.118899	0.148137	0.806955	0.321612
72210	BL	1.49781	15.783	12.1964	0.4704	0.278504	18.0858	10.9449	1.06986	1.46215	1.05967	14.0984	0.444927	0.526441	1.08005	6.67221	6.15936	0.0220766	0.349828	7.59264	0.205482
72210	PostR1	1.00096	17.3161	13.2726	0.378895	0.288413	17.9777	10.5186	3.85681	4.53543	0.972686	10.0718	0.983996	0.429791	4.59198	2.45999	5.01612	0.0508963	0.135724	5.99446	0.147034
72210	PostR2	1.12922	18.4838	14.3698	0.379059	0.919814	13.9801	8.01856	7.09609	8.11663	0.824387	6.36978	2.27435	0.259775	7.24453	2.51557	4.17495	0.0583168	0.0795229	3.40888	0.296885
72210	PreATI	1.62764	18.4894	12.3126	0.893407	0.775313	23.6124	7.37446	2.462	2.89716	0.702146	11.5681	0.585336	0.327326	3.42986	4.32584	3.47479	0.17329	0.206665	4.48757	0.274697
72210	PreR	2.25967	18.7073	12.0516	1.19459	0.470292	21.519	9.31154	1.25495	2.55894	1.04621	12.9167	0.487897	0.441371	2.26092	4.2955	3.49324	0.0515561	0.270355	5.17825	0.230116

## Sheet: F_CyTOF_analysis_Fig4_5
Cell_feature	FC_PreATI_v_BL	p_value_PreATI_v_BL	significant_p_value_PreATI_v_BL	FC_PreR_v_BL	p_value_PreR_v_BL	significant_p_value_PreR_v_BL	abs_FC_PostR1_v_BL	p_value_PostR1_v_BL	significant_p_value_PostR1_v_BL
CD27negIgDneg_CD11c	1.2689751991927687	0.3125	No	1.3577747564023854	0.031250000000000014	Yes	2.234710517714243	0.031250000000000014	Yes
CD27negIgDneg_CD20	0.9949942743642777	0.0625	No	0.9721482634558136	0.031250000000000014	Yes	0.9726175628881282	0.031250000000000014	Yes
CD27negIgDneg_CD21	0.9779124559723615	0.625	No	1.1374850337073814	0.031250000000000014	Yes	1.0494133894524988	0.3125000000000001	No
CD27negIgDneg_CD24	0.9469628068894932	0.4375	No	0.8130395233216586	0.21875000000000008	No	0.7914742930042813	0.031250000000000014	Yes
CD27negIgDneg_CD38	1.20537	0.125	No	1.115674511355087	0.09375	No	1.1523456181921736	0.09375	No
CD27negIgDneg_CD40	0.9975045765285814	1	No	1.0163528868912757	0.15625000000000006	No	0.9931951187927529	0.43750000000000017	No
CD27negIgDneg_CD71	1.3178359276485259	0.0625	No	2.15383	0.031250000000000014	Yes	2.4080875660326475	0.0625	No
CD27negIgDneg_CXCR3	1.2462602368580589	0.125	No	0.6943939456140988	0.8437500000000002	No	0.9344262648825391	0.8437500000000002	No
CD27negIgDneg_CXCR5	1.0150397289252129	0.1875	No	0.92623	0.6875000000000002	No	0.9000714225979778	0.8437500000000002	No
CD27negIgDneg_Ki67	1.2954188084812341	0.0625	No	1.2908110585003068	0.031250000000000014	Yes	1.7112999873073447	0.0625	No
CD27negIgDneg_TBET	1.3557831914842373	0.3125	No	1.0677770458401887	0.8437500000000002	No	1.4375953311267453	0.09375	No
naiveBcells_BDCA1	1.3593560904907578	0.4375	No	1.5971887630457906	0.0625	No	1.4304950934326892	0.15625000000000006	No
naiveBcells_CD21	1.0145528132032184	0.0625	No	1.0653544088450166	0.031250000000000014	Yes	1.0630955128707293	0.031250000000000014	Yes
naiveBcells_CD24	1.0973734602975562	0.625	No	0.7368640882736508	0.031250000000000014	Yes	0.7433953604335506	0.031250000000000014	Yes
naiveBcells_CD38	0.9924786353454674	0.125	No	1.1211359589570535	0.0625	No	1.1488513270277423	0.031250000000000014	Yes
naiveBcells_CXCR5	1.0032837855433636	0.3125	No	0.9852136349247781	0.5625000000000002	No	0.9675733388593497	0.43750000000000017	No
naiveBcells_TBET	1.054606418213699	0.4375	No	0.9817030598957691	0.21875000000000008	No	1.185866525949897	0.8437500000000002	No
ABC_BDCA1	1.151219512195122	0.625	No	1.4239412292948948	0.21875000000000008	No	1.7718998467747795	0.15625000000000006	No
ABC_CCR2	1.3171375759176136	0.3125	No	0.8150396207026026	0.15625000000000006	No	0.7207301749865802	0.3125000000000001	No
ABC_CD11c	1.1038454030841307	0.625	No	0.8551530536299603	0.3125000000000001	No	1.2141021058425852	0.3125000000000001	No
ABC_CD21	1.0188112848888629	1	No	1.0148274630160574	0.43750000000000017	No	0.970376	0.3125000000000001	No
ABC_CD24	0.9223751850727883	0.8125	No	1.2179748274695488	0.43750000000000017	No	0.9685952032518008	0.6875000000000002	No
ABC_CD38	1.012873154510777	0.8125	No	0.8716418555104894	0.6875000000000002	No	1.0445857251981714	0.5625000000000002	No
ABC_CX3CR1	1.1187265917602982	0.3125	No	1.1667942320314042	0.5625000000000002	No	1.7070308034889954	0.15625000000000006	No
ABC_CXCR3	2.4771341463414625	0.3125	No	1.6313434104840587	0.8437500000000002	No	2.495251490434469	1	No
ABC_CXCR5	0.9700132206241731	0.625	No	0.8776187571956896	0.8437500000000002	No	0.8150023693576655	0.5625000000000002	No
ABC_Ki67	1.046332812461244	1	No	0.7380506664680205	0.15625000000000006	No	0.876695	0.21875000000000008	No
ABC_TBET	1.0407665505226487	0.3125	No	1.248417486835548	0.031250000000000014	Yes	1.8992911838093842	0.031250000000000014	Yes
ASC_CCR2	2.000000000000003	0.625	No	1.424418604651167	0.43750000000000017	No	1.7441860465116303	0.8437500000000002	No
ASC_CD11c	0.12643678160919528	0.5838824207703652	No	0.5500000989999776	0.8551321405847059	No	0.7482991551020769	0.41849223344681974	No
ASC_CD21	1.217701217701219	0.4375	No	1.0234001007810527	0.9999999999999998	No	1.0513227513227514	0.9999999999999998	No
ASC_CD40	0.9832433180999867	0.625	No	0.8215933432196407	0.15625000000000006	No	0.9844290657439451	0.9999999999999998	No
ASC_CD86	1.069958847736626	0.4375	No	1.5389590315967596	0.031250000000000014	Yes	1.433800868924669	0.0625	No
ASC_CXCR3	2.17391	0.8125	No	0.9198312236286921	1	No	1.08844	1	No
ASC_CXCR5	0.3626373626373626	0.625	No	0.2140286494344576	0.10564542920187692	No	0.707426	0.6875000000000002	No
ASC_Ki67	0.9900575614861324	0.3125	No	0.9727837184136159	0.9999999999999998	No	0.9697191697191697	0.5625000000000002	No
ASC_TBET	5185185.185185189	0.5838824207703652	No	1.2886772740861143	0.8437500000000002	No	9.147865100252911	0.059058229090536735	No
IgDnegIgMneg_BDCA1	1.2674743279104652	0.3125	No	1.3051608812203859	0.3125000000000001	No	1.2941818049588556	0.09375	No
IgDnegIgMneg_CCR2	0.9973837089530713	0.4375	No	0.7491397781449723	0.031250000000000014	Yes	0.7351566871421181	0.031250000000000014	Yes
IgDnegIgMneg_CD11c	1.2169808381367766	0.125	No	1.469681333079267	0.031250000000000014	Yes	2.697562899044673	0.031250000000000014	Yes
IgDnegIgMneg_CD21	0.96702	0.1875	No	1.0352811919871716	0.8437500000000002	No	0.9697500427867766	0.031250000000000014	Yes
IgDnegIgMneg_CD24	0.9278807897734762	0.3125	No	0.9362247051442808	0.3125000000000001	No	0.8663677080735828	0.031250000000000014	Yes
IgDnegIgMneg_CD38	1.016281922605109	0.8125	No	1.0886467659084718	0.15625000000000006	No	1.2140146256057711	0.43750000000000017	No
IgDnegIgMneg_CD40	0.9968624657904224	0.8125	No	1.000613747003987	0.9999999999999998	No	0.988195	0.031250000000000014	Yes
IgDnegIgMneg_CD71	1.3955986899912103	0.0625	No	1.6903848272824866	0.0625	No	2.0153042704039352	0.031250000000000014	Yes
IgDnegIgMneg_CXCR3	1.9129849261611462	0.1875	No	0.870642	0.6875000000000002	No	1.2778078674297284	0.9999999999999998	No
IgDnegIgMneg_CXCR5	1.0343585560055915	0.1875	No	0.956447	0.6875000000000002	No	0.9354117251121006	0.5625000000000002	No
IgDnegIgMneg_Ki67	1.1939183531382007	0.125	No	1.0253212332749835	1	No	1.6818306256634603	0.3125000000000001	No
IgDnegIgMneg_TBET	1.6074752276379196	0.0625	No	1.0666980508194714	0.6875000000000002	No	1.6068551880344304	0.0625	No
IgDnegIgMpos_BDCA1	1.1576051779935281	1	No	1.0923937732341253	0.6875000000000002	No	1.1056636308822212	0.21875000000000008	No
IgDnegIgMpos_CCR2	1.0814814814814848	0.8125	No	0.8804728244957578	0.43750000000000017	No	0.6110977777738987	0.15625000000000006	No
IgDnegIgMpos_CD11c	0.8888888888888906	0.625	No	1.226339104196536	0.21875000000000008	No	1.481610591056757	0.15625000000000006	No
IgDnegIgMpos_CD21	0.9562573099415211	0.1875	No	0.9849174845564336	0.3125000000000001	No	1.0085956427877862	0.8437500000000002	No
IgDnegIgMpos_CD24	0.9492063492063492	0.1875	No	0.9696694534489965	0.3125000000000001	No	0.8563113801258668	0.09375	No
IgDnegIgMpos_CD38	0.7588932806324129	0.625	No	1.0158766324849375	1	No	1.034369885433715	0.09375	No
IgDnegIgMpos_CD71	1.6500000000000004	0.625	No	2.908882039787057	0.059058229090536735	No	2.77978	0.031250000000000014	Yes
IgDnegIgMpos_CX3CR1	2.0386100386100328	0.8125	No	1.8773306718686198	0.589639	No	3.4233780327106333	0.3125000000000001	No
IgDnegIgMpos_CXCR3	2.860000000000001	0.4375	No	0.7193282686288471	0.589639	No	1.2072104959749046	0.8437500000000002	No
IgDnegIgMpos_CXCR5	1.2943262411347516	0.3125	No	1.1125817155256947	0.9999999999999998	No	1.057552948785798	0.5625000000000002	No
IgDnegIgMpos_Ki67	1.0833333333333337	1	No	1.3005090789684333	0.43750000000000017	No	1.2578774190773663	0.9999999999999998	No
IgDnegIgMpos_TBET	2.679611650485433	0.125	No	1.4438156262710984	0.21875000000000008	No	2.625548500968308	0.031250000000000014	Yes
IgDposIgMpos_BDCA1	1.32835	0.3125	No	1.0761143200517562	0.21875000000000008	No	1.2100600145387872	0.21875000000000008	No
IgDposIgMpos_CCR2	1.17676	0.1875	No	0.8070295524030309	0.43750000000000017	No	0.730331	0.3125000000000001	No
IgDposIgMpos_CD11c	1.7673083197389863	0.0625	No	1.4317663208926161	0.031250000000000014	Yes	2.236219959201916	0.09375	No
IgDposIgMpos_CD21	0.9157096247960843	0.125	No	0.9967662983334078	0.8437500000000002	No	0.984951	0.0625	No
IgDposIgMpos_CD24	0.9858177673584475	0.125	No	0.9634187842031657	0.5625000000000002	No	0.8985526234556771	0.031250000000000014	Yes
IgDposIgMpos_CD38	1.2691562932226832	0.3125	No	0.9689592047602738	0.8437500000000002	No	1.4542786275223851	0.031250000000000014	Yes
IgDposIgMpos_CD71	1.5587275693311546	0.3125	No	2.2262636337618606	0.43750000000000017	No	2.185537570279958	0.031250000000000014	Yes
IgDposIgMpos_CX3CR1	2.7480735032602217	0.0625	No	1.9593766510641042	0.43750000000000017	No	2.9530820144869874	0.09375	No
IgDposIgMpos_CXCR3	4.280913978494621	0.125	No	2.366477119731101	0.43750000000000017	No	2.851798730549205	0.9999999999999998	No
IgDposIgMpos_CXCR5	1.1262614936084319	0.3125	No	1.0027292779916357	1	No	1.0304035593331442	0.9999999999999998	No
IgDposIgMpos_Ki67	2.156256824634195	0.125	No	1.153686143856644	0.5625000000000002	No	1.6127898976371016	0.5625000000000002	No
IgDposIgMpos_TBET	1.4026854059480456	0.125	No	1.2834190286206264	0.8437500000000002	No	1.7708391412403226	0.0625	No
plasmablast_CCR2	0.9659090909090899	0.625	No	0.8126250168734452	0.6875000000000002	No	1.497769890212588	0.3125000000000001	No
plasmablast_CD11c	1.81818e+06	0.3125	No	2.591791383154365	0.7874064906662693	No	7.211620902520188	0.031250000000000014	Yes
plasmablast_CD21	1.2382518796992499	0.125	No	1.1176538732621077	0.3125000000000001	No	1.2620029076853434	0.21875000000000008	No
plasmablast_CD24	1.2987e+06	0.3125	No	2.9634543592471654	0.1775298524121535	No	2.6053224541356417	0.10564542920187692	No
plasmablast_CD40	0.9603300446323707	0.8125	No	0.8296027846574842	0.031250000000000014	Yes	0.9582054780359714	0.8437500000000002	No
plasmablast_CD71	1.0791050035236076	0.1875	No	1.3427054637060158	0.3125000000000001	No	1.2311597750223593	0.5625000000000002	No
plasmablast_CD86	1.1188811188811199	0.8125	No	1.5281458154851644	0.0625	No	1.5200402834908098	0.3125000000000001	No
plasmablast_CXCR3	2.105263157894736	0.4375	No	0.7536017889910711	1	No	0.6677973317994634	0.7874064906662693	No
plasmablast_CXCR5	1	0.5838824207703652	No	3.3894305839897307	0.21875000000000008	No	1.6191813274787292	0.43750000000000017	No
plasmablast_Ki67	0.990525	0.625	No	0.9639638671113849	0.9999999999999998	No	1.0166217756650195	1	No
plasmablast_TBET	1.6969696969696961	0.1875	No	0.4006497948016417	0.5625000000000002	No	4.852681308850837	0.031250000000000014	Yes
transitionalBcells_BDCA1	0.8632326820603913	1	No	0.9918003111202335	0.5625000000000002	No	1.0203763683558946	0.43750000000000017	No
transitionalBcells_CD21	1.0361660138145492	0.625	No	1.2079258668337867	0.031250000000000014	Yes	1.2136440085939177	0.031250000000000014	Yes
transitionalBcells_CXCR5	0.9806285785932206	0.8125	No	0.9758943093239938	0.9999999999999998	No	0.999874	0.6875000000000002	No
transitionalBcells_Ki67	1.2526861017358608	0.125	No	1.1657595977649258	0.09375	No	1.0980025915883453	0.5625000000000002	No
basophils_Ki67	1.7734640784470734	0.1875	No	1.3554694406520573	0.8437500000000002	No	1.52567	0.5625000000000002	No
pDCs_CD38	1.0455382958217592	0.4375	No	1.0238079053276457	0.09375	No	1.018632030606922	0.9999999999999998	No
pDCs_CD68	1.272789049997187	0.0625	No	1.3656588988865328	0.43750000000000017	No	1.3579963088522857	0.9999999999999998	No
pDCs_CD71	1.2505815155587714	0.3125	No	1.082342672561846	0.5625000000000002	No	1.3558578479188064	0.09375	No
pDCs_CD86	1.3408971323335948	0.8125	No	1.9877531754338145	0.0625	No	1.9444438320693969	0.0625	No
pDCs_CD141	0.8930266326675157	0.3125	No	0.807899	0.15625000000000006	No	0.7332665300873062	0.3125000000000001	No
pDCs_CXCR3	1.9818171838407488	0.0625	No	0.9938750742789371	0.5625000000000002	No	0.8131759664260062	0.9999999999999998	No
pDCs_Ki67	1.1878292125772563	1	No	0.8583027873586864	0.21875000000000008	No	0.8917457812693816	0.5625000000000002	No
CD56hiNK_CCR2	1.4208255057311676	0.125	No	0.7372650324639396	1	No	0.74284	0.6875000000000002	No
CD56hiNK_CD16	1.1213061083828713	0.3125	No	1.07636	0.8437500000000002	No	0.7125575886516713	0.5625000000000002	No
CD56hiNK_CD27	0.9845490453894351	0.4375	No	1.2785162656422087	0.15625000000000006	No	1.1783084779300654	0.3125000000000001	No
CD56hiNK_CD38	1.0429421164772728	0.125	No	1.0115711891206989	0.0625	No	1.0205459665025576	0.09375	No
CD56hiNK_CX3CR1	1.0209618295475897	0.0625	No	1.1466233360635978	0.3125000000000001	No	1.8098246557246334	0.9999999999999998	No
CD56hiNK_Ki67	1.3965191078152233	0.1875	No	1.2967523132138141	0.3125000000000001	No	1.1511124811272748	0.6875000000000002	No
CD56hiNK_TBET	0.9931621621621614	1	No	1.0029856813421036	0.5625000000000002	No	1.0080554901126462	0.3125000000000001	No
CD56midNK_CD38	1.1466504784525668	0.125	No	1.064627870908824	0.09375	No	1.0458575202224274	0.031250000000000014	Yes
CD56midNK_CX3CR1	1.0720082200700858	0.125	No	1.421460582369263	0.43750000000000017	No	0.9896434856539368	0.5625000000000002	No
CD56midNK_Ki67	1.7053865324724822	0.125	No	0.8521548248482126	0.21875000000000008	No	0.8578899444666126	0.21875000000000008	No
CD14negCD16posmono_CCR2	0.9748938695394185	0.8125	No	2.274491476221303	0.0625	No	1.6797751363990447	0.0625	No
CD14negCD16posmono_CD4	1.3936075005327075	0.3125	No	1.1277937558836615	0.43750000000000017	No	1.5572121818854936	0.43750000000000017	No
CD14negCD16posmono_CD11b	2.1182061289389975	0.3125	No	2.229593404519917	0.5625000000000002	No	1.5519460193273296	0.8437500000000002	No
CD14negCD16posmono_CD40	1.3107538376746912	0.0625	No	1.4171305205275844	0.8437500000000002	No	1.276346829345201	0.0625	No
CD14negCD16posmono_CD71	2.164912280701749	0.1875	No	3.946432008372979	0.031250000000000014	Yes	6.427034252794156	0.031250000000000014	Yes
CD14negCD16posmono_CD86	1.1461649571243129	0.0625	No	1.3177439820420966	0.9999999999999998	No	1.2147743367991752	0.21875000000000008	No
CD14negCD16posmono_CX3CR1	1.0481296614531088	1	No	1.0228190228970837	0.5625000000000002	No	1.035610814825653	0.6875000000000002	No
CD14negCD16posmono_Ki67	1.6594928617089248	1	No	1.3995489905503178	0.6875000000000002	No	3.6303265417964257	0.09375	No
CD14negCD16posmono_TBET	1.2313432835820883	1	No	0.9847673517858673	1	No	1.9780304442741656	0.15625000000000006	No
cDCother_CCR2	1.0656642637928617	1	No	1.0247542760800779	0.6875000000000002	No	1.0005872187396045	1	No
cDCother_CD11b	1.1194450046515252	0.4375	No	1.2852906249456246	0.43750000000000017	No	1.6247506938517888	0.21875000000000008	No
cDCother_CD40	1.174454522989256	0.4375	No	2.6190224129479334	0.031250000000000014	Yes	2.1308329747281887	0.031250000000000014	Yes
cDCother_CD68	1.0785160677633792	0.8125	No	1.0490651108652926	0.6875000000000002	No	1.214454186805829	0.3125000000000001	No
cDCother_CD71	1.5602167676123713	0.0625	No	4.237595465160776	0.031250000000000014	Yes	4.044222040693948	0.031250000000000014	Yes
cDCother_CD86	0.9462928405625612	0.1875	No	1.4878915203894492	0.031250000000000014	Yes	1.5384583766320241	0.0625	No
cDCother_CX3CR1	1.2662562949815848	0.625	No	1.2311434409612176	0.43750000000000017	No	1.270743608208378	0.15625000000000006	No
cDCother_Ki67	1.135039608252236	1	No	0.8466345453310492	0.21875000000000008	No	0.9357767484282844	0.21875000000000008	No
cDC1_CCR2	1.0100839393842307	0.0625	No	1.0067268167893904	0.15625000000000006	No	1.0025656365385045	0.5625000000000002	No
cDC1_CD40	1.5341587301587327	0.4375	No	1.7477938404785494	0.09375	No	1.6842778665749627	0.031250000000000014	Yes
cDC1_CD68	1.0391279415077739	0.8125	No	0.553419	0.031250000000000014	Yes	0.5407547377552786	0.031250000000000014	Yes
cDC1_CD71	1.5131915244455423	0.0625	No	4.779208510429573	0.031250000000000014	Yes	5.815141229315899	0.031250000000000014	Yes
cDC1_CD86	1.3135796705129061	0.0625	No	1.6907880900133927	0.09375	No	1.803025656184798	0.21875000000000008	No
cDC1_CD141	1.4344023323615185	0.0625	No	1.0619699870609631	0.5625000000000002	No	0.8689389693533351	0.5625000000000002	No
cDC1_Ki67	0.9657970215113076	0.4375	No	0.9747335789171925	0.21875000000000008	No	0.9484760944268422	0.43750000000000017	No
cDC2_CCR2	1.0054054054054047	0.625	No	1.0310883676935454	0.3125000000000001	No	0.9931969955774352	0.9999999999999998	No
cDC2_CD11b	2.3128164135358373	0.4375	No	1.2276772843423422	1	No	1.4326173451089412	0.6875000000000002	No
cDC2_CD71	1.5205479452054782	0.0625	No	2.2530091801435197	0.031250000000000014	Yes	2.7843850116943467	0.031250000000000014	Yes
cDC2_CD86	1.208633093525178	0.125	No	1.7937884647292301	0.031250000000000014	Yes	1.6815082243887651	0.031250000000000014	Yes
cDC2_Ki67	1.063126452041155	0.625	No	1.002600180208618	0.9999999999999998	No	1.0232559629911353	0.9999999999999998	No
CD14posCD16negmono_CD4	1.3944038080288224	0.3125	No	0.7894155498671263	0.9999999999999998	No	1.5775567171703455	0.6875000000000002	No
CD14posCD16negmono_CD40	1.040000903171962	0.125	No	3.196867210657487	0.031250000000000014	Yes	2.489345423298761	0.031250000000000014	Yes
CD14posCD16negmono_CD71	2.921004917137991	0.125	No	19.010882592596143	0.031250000000000014	Yes	16.203167097471283	0.031250000000000014	Yes
CD14posCD16negmono_CD86	1.1332525756940801	0.125	No	1.2134914846828995	0.15625000000000006	No	1.2027677673802248	0.43750000000000017	No
CD14posCD16negmono_CX3CR1	1.1435607055091892	0.4375	No	1.0448305478882431	0.3125000000000001	No	1.095618565586441	0.9999999999999998	No
CD14posCD16negmono_Ki67	0.9983717184258291	0.1875	No	0.9739122831351146	0.3125000000000001	No	1.036645316347561	0.43750000000000017	No
CD14posCD16posmono_CCR2	1.0738571861905135	0.4375	No	1.2290741315821374	0.6875000000000002	No	1.0200532415972836	0.5625000000000002	No
CD14posCD16posmono_CD4	1.7471067795621051	0.125	No	1.3094021195988965	0.6875000000000002	No	1.5486710425774965	0.3125000000000001	No
CD14posCD16posmono_CD40	1.3541495358201798	0.0625	No	1.758568739144523	0.6875000000000002	No	1.2175947416470585	0.5625000000000002	No
CD14posCD16posmono_CD68	1.1794239304622138	0.0625	No	1.52958	0.8437500000000002	No	1.1380009610002522	0.09375	No
CD14posCD16posmono_CD71	1.817339373970351	0.0625	No	4.106193357469009	0.031250000000000014	Yes	3.930153872933575	0.031250000000000014	Yes
CD14posCD16posmono_CD86	1.3128900204682734	0.0625	No	1.4277144147433352	0.8437500000000002	No	1.0436955412690119	0.6875000000000002	No
CD14posCD16posmono_CX3CR1	1.2141021678462105	0.1875	No	0.8832065150218041	0.9999999999999998	No	0.9506726533214469	0.6875000000000002	No
CD14posCD16posmono_Ki67	0.7898032061603889	0.3125	No	0.501438	0.15625000000000006	No	0.9113594763855788	0.6875000000000002	No
CD14posCD16posmono_TBET	0.766807	0.1875	No	0.2107792179297489	0.09375	No	0.7753120683191692	0.09375	No
nonnaiveCD4_CCR2	1.0942692740647653	0.625	No	1.1674843686724863	0.15625000000000006	No	1.1293071582507141	0.21875000000000008	No
nonnaiveCD4_CX3CR1	1.5695253342564122	0.1875	No	1.125740652746429	0.43750000000000017	No	1.4063067789249017	0.21875000000000008	No
nonnaiveCD8_CCR2	0.8548512881080574	0.0625	No	1.1265630270875922	1	No	0.7356583239969483	0.5625000000000002	No
nonnaiveCD8_CD71	2.291452255609628	0.125	No	2.1567704600960145	0.15625000000000006	No	5.700197862855741	0.031250000000000014	Yes
nonnaiveCD8_CX3CR1	1.5388068287567478	0.125	No	1.3438126320689068	0.5625000000000002	No	0.8532664062172342	0.43750000000000017	No
CD56hiNK_CD25	0.8999892198785414	0.125	No	0.8134647522647758	0.031250000000000014	Yes	0.7896174199146596	0.09375	No
CD56hiNK_CD39	1.3758907913003255	0.0625	No	1.4772363149687628	0.21875000000000008	No	1.821257646999961	0.031250000000000014	Yes
CD56hiNK_CD95	1.4718065781435852	0.0625	No	1.852104543554576	0.0625	No	1.776972212740097	0.031250000000000014	Yes
CD56hiNK_CD127	0.8493516399694898	0.8125	No	1.0954904851814504	1	No	1.1018671859833624	0.43750000000000017	No
CD56hiNK_GzA	1.1897094830248183	0.125	No	1.1246887439173974	0.0625	No	1.1680974737734693	0.21875000000000008	No
CD56hiNK_GzB	1.0641402789713756	0.125	No	1.3490235539465876	0.43750000000000017	No	1.4188334691795699	0.43750000000000017	No
CD56hiNK_Perforin	1.7480937994533177	0.125	No	1.8977225898069852	0.031250000000000014	Yes	1.6323483992064247	0.15625000000000006	No
CD56hiNK_TCF1	0.9941389087890864	0.3125	No	0.8793907657737045	0.031250000000000014	Yes	0.8352459091967033	0.0625	No
CD56hiNK_TIGIT	0.7866456161363201	0.1875	No	1.8569150564182246	0.43750000000000017	No	2.7457307552865506	0.0625	No
CD56midNK_CD39	2.365174960800827	0.0625	No	1.7260689212531002	0.15625000000000006	No	1.438274729252712	0.43750000000000017	No
CD56midNK_CD95	1.377632373337606	0.0625	No	1.5409979153263478	0.09375	No	1.4931014103436735	0.0625	No
CD56midNK_EOMES	1.028599489156097	0.625	No	1.020378497670972	0.5625000000000002	No	0.9963937975047467	0.6875000000000002	No
CD56midNK_GzA	1.0006708743284147	0.3125	No	0.9946034518551539	0.5625000000000002	No	1.001366661555281	0.21875000000000008	No
CD56midNK_GzB	1.0054427276069169	0.0625	No	0.9856124838951904	0.5625000000000002	No	0.9844070065651398	0.031250000000000014	Yes
CD56midNK_Perforin	1.012061072525098	0.125	No	1.0053763924771373	0.15625000000000006	No	1.0097422431107779	0.5625000000000002	No
CD56midNK_TCF1	0.893485	0.3125	No	0.538985	0.031250000000000014	Yes	0.5702840054091213	0.031250000000000014	Yes
CD56midNK_TIGIT	0.97988646277657665	0.4375	No	0.5258682183335027	0.3125000000000001	No	0.8270822654277471	0.0625	No
CD4Tfh_Bcl2	0.9831263387219077	0.0625	No	0.9940295445256022	0.8437500000000002	No	1.0041652289104428	0.43750000000000017	No
CD4Tfh_CCR7	1.0042751651768356	0.3125	No	1.1311227891863596	0.031250000000000014	Yes	1.0282237876900513	1	No
CD4Tfh_CD25	0.8214903376193707	0.0625	No	1.0099466583918855	0.9999999999999998	No	0.9279414766656848	0.15625000000000006	No
CD4Tfh_CD38	1.4942398116601747	0.0625	No	1.344117463784834	0.031250000000000014	Yes	1.3920386422409263	0.5625000000000002	No
CD4Tfh_CD39	1.5526	0.8125	No	1.524223157785821	0.0625	No	0.7706916404927056	0.5625000000000002	No
CD4Tfh_CD95	1.007374899657692	0.3125	No	1.0220064256522563	0.43750000000000017	No	1.0248642453074888	0.43750000000000017	No
CD4Tfh_CD127	0.9140171589301379	0.0625	No	1.1647945118431202	0.43750000000000017	No	1.2164766288105637	0.031250000000000014	Yes
CD4Tfh_CTLA4	1.4260750433372484	0.125	No	1.0897732987723632	0.43750000000000017	No	0.8787191445972927	0.21875000000000008	No
CD4Tfh_CXCR3	1.2785675748296106	0.3125	No	1.059532502392862	0.9999999999999998	No	0.822386	0.8437500000000002	No
CD4Tfh_ICOS	1.8839517687029497	0.125	No	2.433892516970847	0.0625	No	1.7714881086319316	1	No
CD4Tfh_Ki67	1.5972819932049815	0.0625	No	0.7272044909899086	0.3125000000000001	No	1.0680767142638028	0.5625000000000002	No
CD4Tfh_TIGIT	0.9104863073774476	0.4375	No	1.3681151784298424	0.031250000000000014	Yes	1.2625651597257095	0.031250000000000014	Yes
CD4Tctl_Bcl2	0.9936124938026768	0.3125	No	0.9830713694479014	0.21875000000000008	No	0.9975869049552925	0.6875000000000002	No
CD4Tctl_CCR7	0.7987563453593863	0.3125	No	1.7794479936713818	0.21875000000000008	No	1.2016487868757812	0.09375	No
CD4Tctl_CD25	0.6690348460683408	0.125	No	1.3155797686075192	0.031250000000000014	Yes	1.1520446585165907	0.21875000000000008	No
CD4Tctl_CD27	1.0012678950159049	0.3125	No	1.346556711116127	0.031250000000000014	Yes	1.1693732704936166	0.5625000000000002	No
CD4Tctl_CD28	0.8959446445904595	0.125	No	1.0776958510841852	0.09375	No	0.997965	0.9999999999999998	No
CD4Tctl_CD38	1.4305567154954961	0.0625	No	1.3207845992212894	0.09375	No	1.5870222757139592	0.031250000000000014	Yes
CD4Tctl_CD39	0.8893480225988714	0.625	No	1.061023871407446	1	No	1.4155621041694286	0.9999999999999998	No
CD4Tctl_CD45RA	1.0749812320800278	0.1875	No	0.6437009687279969	0.031250000000000014	Yes	1.0011116490667265	0.21875000000000008	No
CD4Tctl_CD95	1.0665506575976138	0.125	No	1.1131703836898688	0.09375	No	1.0759000386438067	0.031250000000000014	Yes
CD4Tctl_CD127	0.9516615629183415	0.1875	No	1.069802333660491	0.3125000000000001	No	1.0499625223536153	0.9999999999999998	No
CD4Tctl_CXCR3	1.0747715223787253	0.3125	No	1.2182420409431587	0.8437500000000002	No	1.054248063153308	0.5625000000000002	No
CD4Tctl_GzA	1.0415513806142058	0.125	No	0.9492263195736886	0.3125000000000001	No	0.9991735748125616	0.6875000000000002	No
CD4Tctl_GzB	1.1222072599531605	0.125	No	1.0207537774637903	0.6875000000000002	No	1.182312546469094	0.15625000000000006	No
CD4Tctl_HLADR	0.9476834515891163	0.3125	No	1.2120650633167633	0.5625000000000002	No	1.2691809485291512	0.6875000000000002	No
CD4Tctl_ICOS	1.512753366888864	0.1875	No	1.5471992347505032	0.15625000000000006	No	2.4584248100475343	0.3125000000000001	No
CD4Tctl_Ki67	1.7269683871514514	0.1875	No	0.9162544615901699	0.9999999999999998	No	1.2419929065380568	1	No
CD4Tctl_PD1	1.0211730498992253	0.4375	No	1.041004860493651	1	No	0.9945856948650009	0.8437500000000002	No
CD4Tctl_Perforin	1.1597760589318582	0.0625	No	1.5203092008083092	0.0625	No	1.7671278731472946	0.0625	No
CD4Tctl_TBET	1.0352989737742297	0.1875	No	0.9513696438163167	0.9999999999999998	No	0.9829105027183258	1	No
CD4Tctl_TCF1	0.8904376945788134	0.125	No	0.9364085393396117	0.6875000000000002	No	0.9579056642934822	0.43750000000000017	No
CD4Tctl_TIGIT	0.9773879142300186	1	No	1.2258190706175052	0.0625	No	1.265894365771349	0.031250000000000014	Yes
CD4Th1_Bcl2	0.9824249984215937	0.3125	No	0.9866324437680946	0.21875000000000008	No	0.9933709936087127	0.43750000000000017	No
CD4Th1_CCR7	0.9101488476195555	0.8125	No	1.3875017525691935	0.3125000000000001	No	1.1249646531742932	0.43750000000000017	No
CD4Th1_CD25	0.9088625106688516	0.1875	No	0.9922869996466435	0.43750000000000017	No	0.9141443997091308	0.8437500000000002	No
CD4Th1_CD27	1.0615293004323278	0.8125	No	1.2365755003318382	0.031250000000000014	Yes	1.0736120680107162	0.15625000000000006	No
CD4Th1_CD28	1.0094987915425162	0.3125	No	1.1071636556862787	0.0625	No	0.9975391713459735	0.9999999999999998	No
CD4Th1_CD38	1.609554351915858	0.0625	No	1.4746308032748907	0.0625	No	1.533088260128386	0.031250000000000014	Yes
CD4Th1_CD39	1.041607629986668	0.3125	No	1.3168296623549285	0.0625	No	1.3566660291095318	0.09375	No
CD4Th1_CD95	1.0681571112844568	0.0625	No	1.0821416115484106	0.0625	No	1.0723867876087132	0.0625	No
CD4Th1 _CD127	0.9645687053940663	0.4375	No	1.107413141847354	0.031250000000000014	Yes	1.0204588041861216	0.21875000000000008	No
CD4Th1_CTLA4	1.2614451469241972	0.3125	No	1.1109044213953327	0.3125000000000001	No	1.1735295230927125	0.43750000000000017	No
CD4Th1_CXCR3	1.5962031113094595	0.0625	No	1.2861491995508951	1	No	0.9540120705193315	0.6875000000000002	No
CD4Th1_CXCR5	1.3197553419865098	0.125	No	1.0813940441634915	0.8437500000000002	No	0.8170953371877445	0.5625000000000002	No
CD4Th1_GzA	1.00312	0.3125	No	0.9728158275603203	0.5625000000000002	No	1.1559138366910944	0.6875000000000002	No
CD4Th1_GzB	1.2478244765515452	0.3125	No	0.9379790589953828	0.21875000000000008	No	1.2136483460599166	0.8437500000000002	No
CD4Th1_ICOS	2.497132102163017	0.1875	No	1.6180343348437827	0.15625000000000006	No	1.8753148618479003	0.43750000000000017	No
CD4Th1_Ki67	1.7097412577945201	0.3125	No	1.4831284605924817	0.6875000000000002	No	1.2638747642329862	0.5625000000000002	No
CD4Th1_PD1	0.8499152012162633	0.8125	No	1.0150066028012397	0.09375	No	1.1319689350876718	0.15625000000000006	No
CD4Th1_Perforin	1.9420968174635451	0.0625	No	1.6852751909091426	0.09375	No	2.0465	0.031250000000000014	Yes
CD4Th1_TCF1	0.9287891481162387	0.625	No	0.9872845019943132	0.5625000000000002	No	0.9374389347587395	0.6875000000000002	No
CD4Th1_TIGIT	0.9387849735212658	0.3125	No	1.6238080108926305	0.031250000000000014	Yes	1.4083039928010388	0.031250000000000014	Yes
otherCD4_Bcl2	0.9866745135100662	0.4375	No	0.9866966408099371	0.21875000000000008	No	1.0026488047404198	0.8437500000000002	No
otherCD4_CCR7	0.9615466565765162	0.625	No	1.0165517184942137	0.8437500000000002	No	0.9237849623817773	0.8437500000000002	No
otherCD4_CD25	0.9513981475883648	0.125	No	1.0551898384759661	0.43750000000000017	No	0.9711223622018749	0.8437500000000002	No
otherCD4_CD27	0.9775787976797163	0.4375	No	1.113181366345012	0.031250000000000014	Yes	1.1130324680381212	0.09375	No
otherCD4_CD28	0.9947264649916088	0.0625	No	1.0890594040688935	0.09375	No	1.0550870981502105	0.09375	No
otherCD4_CD38	1.0247904478968997	0.1875	No	1.041211393589145	0.031250000000000014	Yes	0.9242930726459413	0.9999999999999998	No
otherCD4_CD39	1.09754	0.0625	No	1.1685831628409653	0.031250000000000014	Yes	1.2339045627092267	0.031250000000000014	Yes
otherCD4_CD45RA	0.9723190513105251	0.4375	No	0.8258999308833215	0.09375	No	0.9886607244478762	0.3125000000000001	No
otherCD4_CD95	1.0960992903860987	0.4375	No	1.2548467951819922	0.031250000000000014	Yes	1.2480545415908177	0.031250000000000014	Yes
otherCD4_CD127	0.9505485257953447	0.0625	No	0.9372804840468896	0.9999999999999998	No	0.9735573577105142	1	No
otherCD4_CXCR3	1.3158197071993483	0.125	No	2.3189912797849934	0.09375	No	1.5534153289123547	0.5625000000000002	No
otherCD4_CXCR5	1.298273530993859	0.1875	No	1.6176468049043518	0.6875000000000002	No	1.3937957151182152	0.9999999999999998	No
otherCD4_ICOS	0.9073252231263598	0.1875	No	1.7396027208572986	0.15625000000000006	No	1.4151230401474082	0.5625000000000002	No
otherCD4_PD1	0.8893046651757397	0.4375	No	1.2576701263029408	0.031250000000000014	Yes	1.3985914621830213	0.031250000000000014	Yes
otherCD4_TCF1	0.9982623118867275	1	No	0.9170253384180619	0.15625000000000006	No	0.9724683627112778	0.43750000000000017	No
otherCD4_TIGIT	0.9707645565676856	0.625	No	1.990696624120057	0.031250000000000014	Yes	1.6737402728201851	0.031250000000000014	Yes
TregCD4_Bcl2	0.986826	0.3125	No	1.0047429195284434	1	No	1.0130479979504639	0.43750000000000017	No
TregCD4_CCR7	0.8381877926926042	0.4375	No	1.0928356904349972	0.15625000000000006	No	0.9333895219935043	0.5625000000000002	No
TregCD4_CD27	0.9738276186645193	0.8125	No	1.0860768053213725	0.031250000000000014	Yes	1.0939360336502786	0.031250000000000014	Yes
TregCD4_CD38	1.3342042091480242	0.4375	No	1.3004756992776632	0.031250000000000014	Yes	1.1756644684308073	0.8437500000000002	No
TregCD4_CD39	0.964574	0.625	No	0.882668	0.43750000000000017	No	0.9847747132968483	0.9999999999999998	No
TregCD4_CD45RA	0.8399669378748107	1	No	1.1100834800404178	0.0625	No	1.0494080099119876	0.3125000000000001	No
TregCD4_CD95	1.1026805375751842	0.3125	No	1.0759181310303094	0.031250000000000014	Yes	1.1387810840414738	0.031250000000000014	Yes
TregCD4_CTLA4	1.1453756943371363	0.625	No	1.117114223225059	0.8437500000000002	No	1.1696006239271157	0.9999999999999998	No
TregCD4_CXCR3	2.2246040526377118	0.1875	No	2.0177658729780634	0.3125000000000001	No	1.5686673860761957	1	No
TregCD4_CXCR5	2.3124354541923746	0.125	No	1.4616113632232322	0.21875000000000008	No	1.3026733858988104	0.9999999999999998	No
TregCD4_HLADR	0.9184245022803617	0.8125	No	0.6503510697325314	0.09375	No	0.6698367792127233	0.15625000000000006	No
TregCD4_ICOS	1.462951263537903	0.125	No	1.636565407004633	0.09375	No	1.3632071497242346	0.3125000000000001	No
TregCD4_Ki67	1.242489598021093	0.625	No	0.8369899495177622	0.09375	No	0.6649597886609767	0.15625000000000006	No
TregCD4_PD1	1.0487460732524874	0.4375	No	0.9884416210785677	0.43750000000000017	No	1.1240297862324913	0.15625000000000006	No
TregCD4_TBET	1.215065404344253	0.3125	No	1.3664832316716733	0.3125000000000001	No	1.2533472772572947	0.21875000000000008	No
TregCD4_TCF1	1.0505955485378744	0.8125	No	1.1271745723627347	0.0625	No	1.1088844566261997	0.09375	No
TregCD4_TIGIT	1.0317865605575334	1	No	1.1511191084722274	0.031250000000000014	Yes	1.1588248009239737	0.0625	No
nnCD8_Bcl2	0.9836504462934292	0.4375	No	0.973717	0.43750000000000017	No	0.9378417529478962	0.0625	No
nnCD8_CCR7	0.768328	0.1875	No	0.848195	0.8437500000000002	No	0.8610540205812178	0.0625	No
nnCD8_CD25	0.894644	0.125	No	1.1288376461397263	0.43750000000000017	No	0.9448648797630882	0.5625000000000002	No
nnCD8_CD27	1.0516001682347371	0.1875	No	1.1966410190584647	0.031250000000000014	Yes	1.2584131714387614	0.15625000000000006	No
nnCD8_CD28	0.9213877978891626	0.0625	No	1.034857851275737	0.6875000000000002	No	0.941221	0.8437500000000002	No
nnCD8_CD38	1.766906108180978	0.0625	No	1.58905	0.031250000000000014	Yes	2.8847947867880794	0.031250000000000014	Yes
nnCD8_CD38HLADR	2.7637926843449705	0.0625	No	2.6151365636210615	0.031250000000000014	Yes	7.639149670106845	0.031250000000000014	Yes
nnCD8_CD39	1.0661951007921868	0.8125	No	1.571762850419767	0.09375	No	2.18898	0.031250000000000014	Yes
nnCD8_CD45RA	0.9244072842262125	0.625	No	0.9058367989730493	1	No	0.9250030903539046	0.21875000000000008	No
nnCD8_CD95	1.1294049563621695	0.0625	No	1.2951274486847524	0.21875000000000008	No	1.3368418302149374	0.031250000000000014	Yes
nnCD8_CD127	0.691809	0.125	No	0.9845060669076101	0.43750000000000017	No	0.732395	0.15625000000000006	No
nnCD8_CXCR3	1.7699801083890196	0.3125	No	1.3535041563604746	0.8437500000000002	No	1.4293974375819645	0.9999999999999998	No
nnCD8_EOMES	1.1575350450756545	0.1875	No	1.1041913932586866	0.43750000000000017	No	1.1923256453416073	0.09375	No
nnCD8_GzA	1.133679638673908	0.125	No	1.0415307899118813	0.8437500000000002	No	1.1112128384003697	0.15625000000000006	No
nnCD8_GzB	1.2165969318413006	0.125	No	1.0963556417080458	0.6875000000000002	No	1.1874305692637424	0.031250000000000014	Yes
nnCD8_HLADR	1.6357770588270069	0.3125	No	2.6777126516019254	0.031250000000000014	Yes	5.965643181539059	0.031250000000000014	Yes
nnCD8_Ki67	2.0488580047403593	0.125	No	1.075243812019149	0.6875000000000002	No	3.2758615640617816	0.031250000000000014	Yes
nnCD8_PD1	1.1319817732362427	0.3125	No	1.4295946626339582	0.0625	No	1.3745936654086344	0.15625000000000006	No
nnCD8_Perforin	1.440013458697475	0.0625	No	1.6786578459106631	0.031250000000000014	Yes	1.6373206729501817	0.0625	No
nnCD8_TBET	1.111461470876636	0.125	No	1.0237485059788825	0.8437500000000002	No	1.1200805589526333	0.0625	No
nnCD8_TCF1	0.9890086864129756	0.0625	No	0.8960095267347175	0.15625000000000006	No	0.8728468653204411	0.3125000000000001	No
nnCD8_TIGIT	1.108485198147364	0.4375	No	1.5645004278466517	0.0625	No	1.6443159684387254	0.031250000000000014	Yes
nngd_Bcl2	0.9931694527874128	0.4375	No	0.9758269497165344	0.3125000000000001	No	0.9842738232871155	0.15625000000000006	No
nngd_CCR7	0.94470733491986425	0.625	No	1.2675569091823753	0.15625000000000006	No	1.540548575447957	0.15625000000000006	No
nngd_CD16	1.129597851817282	1	No	1.3351141753011126	0.0625	No	1.0530825377803508	0.8437500000000002	No
nngd_CD25	0.9313883620679089	0.3125	No	1.4344491791192875	0.21875000000000008	No	1.5489112219682555	0.5625000000000002	No
nngd_CD27	1.0194941829288255	1	No	1.5215744780345393	0.15625000000000006	No	1.7744398749903272	0.3125000000000001	No
nngd_CD28	0.82658	0.0625	No	0.9610576731806216	0.5625000000000002	No	1.164947096680696	0.3125000000000001	No
nngd_CD38	1.98197	0.0625	No	1.4390667944081867	0.031250000000000014	Yes	1.5117614273750817	0.031250000000000014	Yes
nngd_CD39	1.313391194541219	0.1875	No	1.99247	0.3125000000000001	No	2.5136922008609006	0.09375	No
nngd_CD45RA	1.0482446204098703	0.125	No	0.9895656871100876	0.8437500000000002	No	0.9314655252243447	0.031250000000000014	Yes
nngd_CD69	1.3573670130857391	0.0625	No	2.182666518604386	0.031250000000000014	Yes	1.4623144184566645	0.15625000000000006	No
nngd_CD95	1.0691581896564055	0.0625	No	1.1214654164095492	0.0625	No	1.1137721405140584	0.031250000000000014	Yes
nngd_CD127	0.8169167078008314	0.625	No	1.2401047496732467	0.21875000000000008	No	1.3219824241999198	0.3125000000000001	No
nngd_CXCR3	1.5312692105645531	0.1875	No	1.3785180056847368	1	No	1.7297821613634756	0.8437500000000002	No
nngd_EOMES	0.9895005611590615	0.3125	No	0.987949	1	No	0.9500731549490237	0.9999999999999998	No
nngd_GzA	1.013814018904862	0.125	No	1.018049609516086	0.3125000000000001	No	0.9786556698616201	0.8437500000000002	No
nngd_GzB	1.0403986946665784	0.3125	No	0.9916966141683705	0.6875000000000002	No	0.95706	0.8437500000000002	No
nngd_HLADR	1.373207513439659	0.1875	No	1.6525616146748396	0.0625	No	1.981185138396875	0.21875000000000008	No
nngd_Ki67	1.5101406998952445	0.0625	No	1.2107231535225071	0.5625000000000002	No	1.3283512204939003	0.15625000000000006	No
nngd_PD1	0.9644883677959414	0.625	No	1.324526981988115	0.0625	No	1.506003587808826	0.43750000000000017	No
nngd_Perforin	1.2196427342386722	0.0625	No	1.1998705633612055	0.031250000000000014	Yes	1.0841186103958322	0.09375	No
nngd_TBET	1.0117168747830516	0.125	No	1.0008673129301942	0.9999999999999998	No	0.9896392786793131	0.9999999999999998	No
nngd_TCF1	1.0658046133302306	0.625	No	1.059867763464839	0.8437500000000002	No	1.280751191159044	0.9999999999999998	No
nngd_TIGIT	1.1222534585258694	0.625	No	1.1603248098053598	0.15625000000000006	No	1.087222839924001	0.15625000000000006	No
