# Supplementary material for: Combination immunotherapy induces post-intervention control of HIV
Source: Research Square preprint supplement (doi:10.21203/rs.3.rs-6141479/v1), 2025-03-19
Supplement: Supplementary file 1 [file eef6b3e83bb97d8cb6f0cb44.pdf]

| Adverse Event (AE)                                                                                    | Severity Grade    |                       |                     |                          | Participants<br>(n = 10) | %  |
|-------------------------------------------------------------------------------------------------------|-------------------|-----------------------|---------------------|--------------------------|--------------------------|----|
|                                                                                                       | Mild<br>(no. AEs) | Moderate<br>(no. AEs) | Severe<br>(no. AEs) | Very severe<br>(no. AEs) |                          |    |
| Not related to<br>p24CE/IL-12, p24CE&p55/IL-12, MVA, Lefitolimod, VRC07-523LS or 10-1074 <sup>†</sup> |                   |                       |                     |                          |                          |    |
| Elevated blood pressure                                                                               | 19                | 0                     | 0                   | 0                        | 6                        | 60 |
| Elevated ALT                                                                                          | 10                | 1                     | 0                   | 0                        | 5                        | 50 |
| Myalgia                                                                                               | 10                | 3                     | 0                   | 0                        | 5                        | 50 |
| Sore throat                                                                                           | 8                 | 1                     | 0                   | 0                        | 5                        | 50 |
| Headache                                                                                              | 7                 | 3                     | 0                   | 0                        | 5                        | 50 |
| Diarrhea                                                                                              | 5                 | 1                     | 0                   | 0                        | 5                        | 50 |
| Elevated AST                                                                                          | 4                 | 1                     | 0                   | 0                        | 5                        | 50 |
| Acute COVID                                                                                           | 3                 | 4                     | 0                   | 0                        | 5                        | 50 |
| Non-specific viral infection                                                                          | 3                 | 5                     | 0                   | 0                        | 5                        | 50 |
| Elevated total bilirubin                                                                              | 19                | 0                     | 0                   | 0                        | 4                        | 40 |
| Fatigue                                                                                               | 7                 | 0                     | 0                   | 0                        | 4                        | 40 |
| Malaise                                                                                               | 3                 | 1                     | 0                   | 0                        | 4                        | 40 |
| Nausea                                                                                                | 3                 | 1                     | 0                   | 0                        | 4                        | 40 |
| Fever                                                                                                 | 3                 | 2                     | 0                   | 0                        | 3                        | 30 |
| Night sweats                                                                                          | 3                 | 2                     | 0                   | 0                        | 3                        | 30 |
| Cough                                                                                                 | 2                 | 2                     | 0                   | 0                        | 3                        | 30 |
| Environmental allergies                                                                               | 2                 | 1                     | 0                   | 0                        | 3                        | 30 |
| Chills                                                                                                | 6                 | 0                     | 0                   | 0                        | 2                        | 20 |
| Cervical lymphadenopathy                                                                              | 3                 | 0                     | 0                   | 0                        | 2                        | 20 |
| Elevated glucose                                                                                      | 2                 | 0                     | 0                   | 0                        | 2                        | 20 |
| Indigestion                                                                                           | 2                 | 0                     | 0                   | 0                        | 2                        | 20 |
| Injection site pain                                                                                   | 2                 | 0                     | 0                   | 0                        | 2                        | 20 |
| Abdominal pain                                                                                        | 1                 | 1                     | 0                   | 0                        | 2                        | 20 |
| Arthralgia                                                                                            | 1                 | 1                     | 0                   | 0                        | 2                        | 20 |
| Back pain                                                                                             | 1                 | 1                     | 0                   | 0                        | 2                        | 20 |
| Elevated potassium                                                                                    | 1                 | 1                     | 0                   | 0                        | 2                        | 20 |
| Herpes simplex 1 lesion                                                                               | 1                 | 2                     | 0                   | 0                        | 2                        | 20 |
| Knee pain                                                                                             | 1                 | 1                     | 0                   | 0                        | 2                        | 20 |
| Low glucose                                                                                           | 1                 | 2                     | 0                   | 0                        | 2                        | 20 |
| Gonorrhea                                                                                             | 0                 | 2                     | 0                   | 0                        | 2                        | 20 |
| Non-specific gastroenteritis                                                                          | 0                 | 2                     | 0                   | 0                        | 2                        | 20 |
| Syphilis                                                                                              | 0                 | 2                     | 0                   | 0                        | 2                        | 20 |
| Tinea                                                                                                 | 0                 | 3                     | 0                   | 0                        | 2                        | 20 |
| Rash                                                                                                  | 3                 | 0                     | 0                   | 0                        | 1                        | 10 |
| Perianal tenderness                                                                                   | 2                 | 0                     | 0                   | 0                        | 1                        | 10 |
| Vomiting                                                                                              | 2                 | 0                     | 0                   | 0                        | 1                        | 10 |
| Abdominal hernia                                                                                      | 1                 | 0                     | 0                   | 0                        | 1                        | 10 |
| Acid reflux                                                                                           | 1                 | 0                     | 0                   | 0                        | 1                        | 10 |
| Anger                                                                                                 | 1                 | 1                     | 0                   | 0                        | 1                        | 10 |
| Arthritis                                                                                             | 1                 | 0                     | 0                   | 0                        | 1                        | 10 |
| Bunion                                                                                                | 1                 | 0                     | 0                   | 0                        | 1                        | 10 |
| Congestion                                                                                            | 1                 | 0                     | 0                   | 0                        | 1                        | 10 |
| Low calcium                                                                                           | 1                 | 0                     | 0                   | 0                        | 1                        | 10 |
| Depression                                                                                            | 1                 | 1                     | 0                   | 0                        | 1                        | 10 |
| Dry cough                                                                                             | 1                 | 0                     | 0                   | 0                        | 1                        | 10 |
| Dry skin                                                                                              | 1                 | 0                     | 0                   | 0                        | 1                        | 10 |
| Foul smelling urine                                                                                   | 1                 | 0                     | 0                   | 0                        | 1                        | 10 |
| Insertion site swelling                                                                               | 1                 | 0                     | 0                   | 0                        | 1                        | 10 |
| Itching                                                                                               | 1                 | 0                     | 0                   | 0                        | 1                        | 10 |
| Loss of smell                                                                                         | 1                 | 0                     | 0                   | 0                        | 1                        | 10 |
| Low phosphate                                                                                         | 1                 | 0                     | 0                   | 0                        | 1                        | 10 |
| Non-specific viral syndrome                                                                           | 1                 | 0                     | 0                   | 0                        | 1                        | 10 |
| Right upper quadrant pain                                                                             | 1                 | 0                     | 0                   | 0                        | 1                        | 10 |
| Runny nose                                                                                            | 1                 | 0                     | 0                   | 0                        | 1                        | 10 |
| Seasonal allergies                                                                                    | 1                 | 0                     | 0                   | 0                        | 1                        | 10 |
| Skin lesion on left knee                                                                              | 1                 | 0                     | 0                   | 0                        | 1                        | 10 |
| Sneezing                                                                                              | 1                 | 0                     | 0                   | 0                        | 1                        | 10 |
| Sore deltoid                                                                                          | 1                 | 0                     | 0                   | 0                        | 1                        | 10 |
| Stomach pains                                                                                         | 1                 | 0                     | 0                   | 0                        | 1                        | 10 |
| Stye                                                                                                  | 1                 | 0                     | 0                   | 0                        | 1                        | 10 |
| Subclinical hypothyroidism                                                                            | 1                 | 0                     | 0                   | 0                        | 1                        | 10 |
| Swollen tastebud                                                                                      | 1                 | 0                     | 0                   | 0                        | 1                        | 10 |
| Swollen tongue                                                                                        | 1                 | 0                     | 0                   | 0                        | 1                        | 10 |
| Tendonitis                                                                                            | 1                 | 0                     | 0                   | 0                        | 1                        | 10 |
| Acne                                                                                                  | 0                 | 1                     | 0                   | 0                        | 1                        | 10 |
| Anal warts                                                                                            | 0                 | 1                     | 0                   | 0                        | 1                        | 10 |
| <sup>†</sup> Not related or probably not related                                                      |                   |                       |                     |                          |                          |    |

<sup>†</sup> Not related or probably not related

**Table S1. Non-intervention-related adverse events.**
