# Supplementary material for: Combination immunotherapy induces post-intervention control of HIV
Source: Research Square preprint supplement (doi:10.21203/rs.3.rs-6141479/v1), 2025-03-19
Supplement: Supplementary file 3 [file 47a08752d4dedd150ba6361d.xlsx]

## Sheet: S4_VL_PK_all
ID	days_post_ATI	VL	VL_Comments	Concentration of VRC07-523LS (µg/mL)	Concentration of 10-1074 (µg/mL)	IC50_VRC07_523LS_PBMC	IC50_10-1074_PBMC	IC50_10-1074_Plasma	IC50_VRC07_523LS_Plasma	IC90_VRC07_523LS_PBMC	IC90_10-1074_PBMC	IC90_10-1074_Plasma	IC90_VRC07_523LS_Plasma
10227	-297	<40	Not detected
10227	-250	<40	Not detected
10227	-247	<40	Not detected
10227	-241	<40	Not detected
10227	-212	<40	Not detected
10227	-163	<40	Not detected
10227	-100	<30	Not detected
10227	-86	<30	Not detected
10227	-73	<30	Not detected	Not Detectable	Not Detectable
10227	-58			128.117	163.587
10227	-44	<30	Not detected	94.6486	108.967
10227	-31			75.1102	79.5217
10227	-30	<30	Not detected
10227	-16	<30	Not detected	60.4893	55.6261
10227	-2	<30	Not detected	47.5275	38.8967
10227	4	<30	Not detected
10227	11	<30	Not detected	179.583	219.864
10227	18	<30	Not detected
10227	24	<30	Not detected	136.145	169.972
10227	33	<20	Not detected
10227	38	<20	Not detected
10227	45	<20	Not detected
10227	55	<20	Not detected
10227	59	<20	Not detected
10227	66	<30	Not detected	69.075	63.142
10227	73	<30	Not detected
10227	82	<30	Not detected	52.7818	40.9242
10227	87	<30	Not detected
10227	93	<20	Not detected
10227	103	<20	Not detected
10227	108	<30	Not detected	41.0884	26.4441
10227	116	<30	Not detected
10227	123	<30	Not detected	33.2051	19.0772
10227	137	<30	Not detected	28.1996	14.0586
10227	142	34
10227	149	363
10227	158	1377
10227	163	1031		19.1388	7.34283	0.23657	0.1055	0.18139	0.39937	1.94641	1.11482	1.56529	3.1357
10227	170	1430
10227	184	863
10227	192	478		14.5156	2.88276
10227	199	283
10227	205	196
10227	212	108
10227	219	933
10227	226	798
10227	235	338
10227	241	263
10227	247	136		8.05003	0.648281	0.23162	0.08044	0.13411	0.24745	1.84751	0.960385	1.22692	2.30777
10227	254	293
10227	261	377
10227	268	152		5.40125	0.350633
10227	283	160
10227	289	499
10227	297	414
10227	300	419		3.25601	Not Detectable	0.16581	0.08851	0.19732	0.45851	1.41469	0.837896	2.13623	4.72674
30988	-416	<40	Not detected
30988	-400	<40	Not detected
30988	-337	<40	Not detected
30988	-333	<40	Not detected
30988	-326	<40	Not detected
30988	-298	<30	Not detected
30988	-242	<30	Not detected
30988	-178	<30	Not detected
30988	-164	<30	Not detected
30988	-150	<30	Not detected	Not Detectable	Not Detectable
30988	-135			117.067	169.991
30988	-122	<30	Not detected	88.055	105.552
30988	-108	<30	Not detected	69.7626	65.396
30988	-79	<30	Not detected	39.6666	26.997
30988	-58	<30	Not detected	31.8395	15.896
30988	-2	<30	Not detected	13.2481	3.17558
30988	2	<20	Not detected
30988	9	<20	Not detected
30988	16	<20	Not detected
30988	24	<20	Not detected
30988	31	<30	Not detected
30988	41	<30	Not detected	73.5229	68.0865
30988	45	<30	Not detected
30988	52	<30	Not detected	58.2929	43.4531
30988	61	<30	Not detected	48.8849	31.3128
30988	67	<20	Not detected
30988	81	100
30988	87	120
30988	88			31.3735	14.4269
30988	94	229
30988	101	1330
30988	107	344		23.2146	7.13454	0.11735	0.06736	0.20386	0.22956	1.19346	0.776683	1.44561	3.26791
30988	115	223
30988	122	1310
30988	129	1090
30988	136	1070
30988	143	542		15.9194	1.92299
30988	150	417
30988	157	747		12.156	0.889546	0.15983	0.05244			1.78897	0.598724
30988	167	2380
30988	177	13064		8.4081	0.425816	0.11012	0.06943	0.17531	0.26822	1.15837	0.663374	1.46098	2.80712
30988	182	25900
30988	189	5050
31092	-450	<40	Not detected
31092	-401	<40	Not detected
31092	-393	<40	Not detected
31092	-387	<40	Not detected
31092	-352	<40	Not detected
31092	-309	<40	Not detected
31092	-254	<30	Not detected
31092	-239	<30	Not detected
31092	-182	<30	Not detected	Not Detectable	Not Detectable
31092	-169			133.797	179.934
31092	-156	<30	Not detected	88.5815	89.4296
31092	-142	<30	Not detected	62.8946	49.0974
31092	-128	<30	Not detected	48.8286	28.7516
31092	-107	<30	Not detected
31092	-100	<30	Not detected	29.2654	8.76184
31092	-79	<30	Not detected
31092	-16	<30	Not detected
31092	-2	<30	Not detected	6.55287	0.316538
31092	5	<48	Not detected
31092	12	<30	Not detected
31092	13			159.866	220.588
31092	20	<30	Not detected
31092	26	<48	Not detected
31092	33	<30	Detected
31092	40	122
31092	47	72
31092	54	2517		57.9255	38.2889			1.58094	0.16933			18.2807	1.21051
31092	61	12300
31092	68	76800
31092	75	71400		40.55	17.8337
31092	82	25578		40.0263	15.6193
31092	89	35977
31092	95	36289		31.442	8.96392
31092	103	75218		25.9929	6.49716	0.1491	0.9736	1.13885	0.21285	1.25372	12.0834	17.0284	2.70656
35933	-297	<40	Not detected
35933	-295	<40	Not detected
35933	-275	<40	Not detected
35933	-261	<40	Not detected
35933	-254	<40	Not detected
35933	-233	<40	Not detected
35933	-177	<40	Not detected
35933	-107	<30	Not detected
35933	-93	<40	Not detected
35933	-72	<30	Not detected	Not Detectable	Not Detectable
35933	-58			141.529	205.354
35933	-44	32		115.427	126.964
35933	-30	<30	Not detected	92.0697	74.4894
35933	-16	<30	Detected	62.2914	43.0936
35933	-10			57.3227	36.1942
35933	-2	<30	Detected	54.1367	28.3091
35933	5	<30	Not detected
35933	12	<30	Not detected	189.611	209.179
35933	20	<30	Detected
35933	26	<30	Detected	151.727	125.605
35933	33	<30	Detected
35933	39	<30	Not detected	114.451	74.8485
35933	46	<30	Not detected
35933	58	<30	Not detected
35933	67	<30	Not detected	71.8727	30.9438
35933	82	<30	Detected	61.8111	19.2953
35933	88	369
35933	95	6433		51.4481	12.9832
35933	102	29407
35933	110	218365		43.6215	7.96235	0.1668	0.04303	0.14465	0.71366	1.38328	0.392219	1.95766	5.42964
35933	115	167186
35933	124	35397		32.0594	4.30108
35933	131	86060
35933	138	76429		28.9308	2.72287			0.5789	0.8977			>50	8.62484
35933	142	114967
42894	-402	<40	Not detected
42894	-383	<40	Not detected
42894	-374	<40	Not detected
42894	-367	<40	Not detected
42894	-346	<40	Not detected
42894	-290	<40	Not detected
42894	-235	<30	Detected
42894	-222	<30	Not detected
42894	-159	<30	Detected	Not Detectable	Not Detectable
42894	-145			138.157	186.691
42894	-131	<30	Detected	99.5526	127.9
42894	-117	<30	Not detected	84.0018	88.7798
42894	-103	<30	Not detected	63.6823	60.4207
42894	-82	<30	Detected	50.9555	41.0721
42894	-45	<30	Not detected
42894	-6	<30	Not detected	21.1608	7.08454
42894	-2	<30	Not detected
42894	5	<30	Not detected
42894	10	<30	Not detected	155.414	237.092
42894	18	<30	Not detected
42894	25	<30	Not detected	118.084	148.68
42894	31	<30	Not detected
42894	43	<30	Detected	83.4581	78.792
42894	54	<30	Detected	73.2958	64.9686
42894	59	<30	Not detected
42894	68	<30	Detected	58.0127	45.6115
42894	75	<30	Not detected
42894	82	<30	Not detected	47.9666	29.3367
42894	88	<30	Not detected
42894	96	<30	Not detected	38.5679	19.8622
42894	103	<30	Not detected
42894	108	<30	Not detected	34.5304	16.1105
42894	117	<30	Detected
42894	123	<30	Not detected	28.0895	10.4784
42894	130	<30	Detected
42894	138	<30	Detected	24.0272	8.00164
42894	145	<30	Detected
42894	152	<30	Detected	21.3241	7.01914
42894	159	117
42894	165	977		19.3622	5.69516	0.04441	0.01832	0.11036	0.06224	0.345799	0.14188	0.794384	0.462698
42894	173	2141
42894	180	2967
42894	185	28276
42894	194	12717		12.2513	2.15864
42894	201	2490		9.87115	1.62219
42894	207	7415
42894	215	4215
42894	225	56985
42894	228	36146				0.06346	0.01727	0.0442	0.1183	0.563269	0.190857	0.498574	0.881535
47019	-506	<40	Not detected
47019	-459	<40	Not detected
47019	-446	<40	Not detected
47019	-443	<40	Not detected
47019	-436	<40	Not detected
47019	-394	<40	Not detected
47019	-367	<40	Not detected
47019	-359	<40	Not detected
47019	-268	<30	Not detected
47019	-254	<40	Not detected
47019	-205	<30	Not detected	Not Detectable	Not Detectable
47019	-191			145.737	183.271
47019	-177	<30	Not detected	105.21	102.472
47019	-164	<30	Not detected	83.8381	61.6058
47019	-155	<30	Not detected
47019	-152	<30	Not detected	59.0201	37.8265
47019	-149	<30	Not detected
47019	-144	<30	Not detected
47019	-137	<30	Not detected	50.2154	26.7972
47019	-123	<30	Not detected	39.01	15.8015
47019	-101	<30	Not detected
47019	-81	<30	Not detected
47019	-64	<30	Not detected
47019	-26	<30	Not detected
47019	-2	<30	Not detected	5.05239	0.48255
47019	5	<30	Not detected
47019	11	<30	Not detected	4.27154	212.083
47019	19	<30	Not detected
47019	25	<30	Not detected	3.35417	124.101
47019	32	<30	Not detected
47019	40	<30	Not detected	2.18728	71.2942
47019	48	<30	Not detected
47019	55	<30	Not detected	1.14289	42.843
47019	62	<30	Not detected
47019	66	<30	Not detected	0.754371	25.7519
47019	74	<30	Not detected
47019	82	<30	Not detected	0.500643	15.6788
47019	87	<30	Not detected
47019	93	<30	Detected	0.406359	12.1721
47019	101	<30	Detected
47019	108	<30	Detected	0.293319	7.35014
47019	115	315
47019	124	1658		0.216737	4.28903
47019	131	886
47019	139	322		0.176985	2.40329			0.05368	0.16692			0.666677	1.23948
47019	149	1290
47019	153	429
47019	157	566
47019	167	534
47019	172	675
47019	181	253
47019	188	403
47019	195	196				0.13624	0.04553	0.05098	0.09375	1.22824	0.456977	0.427188	0.783704
47019	201	436
47019	206	561
47019	213	389
47019	223	202
47019	228	1076				0.12775	0.02539	0.04872	0.13318	0.741725	0.125004	0.306121	0.809057
47019	237	1226
47019	244	2275
47019	251	2663
47019	257	944
47019	265	1007
47019	270	1140
47019	279	1244
47019	286	991				0.2212	0.03794	0.02784	0.1398	0.790186	0.170529	0.320962	0.712568
48758	-352	<40	Not detected
48758	-339	<40	Detected
48758	-332	<40	Not detected
48758	-325	<40	Not detected
48758	-304	<40	Not detected
48758	-234	<40	Not detected
48758	-192	<40	Not detected
48758	-184	<40	Not detected
48758	-74	<30	Detected	Not Detectable	Not Detectable
48758	-59			136.896	200.545
48758	-45	<30	Not detected	100.1	133.381
48758	-31	<30	Not detected	81.8348	94.64
48758	-16	<30	Not detected	65.0401	64.2557
48758	-2	<30	Detected	49.1085	41.7458
48758	3	<30	Not detected
48758	10	<30	Not detected
48758	11			187.935	271.696
48758	17	<30	Not detected
48758	24	<30	Not detected	151.875	170.838
48758	32	<30	Not detected
48758	38	<30	Not detected	114.024	124.141
48758	45	<30	Not detected
48758	52	<30	Not detected	102.99	100.421
48758	59	<30	Not detected
48758	66	<30	Not detected	79.1806	64.1486
48758	73	<30	Not detected
48758	82	<30	Not detected	67.3725	47.2189
48758	87	<30	Not detected
48758	94	<30	Not detected	54.8645	33.8424
48758	101	<30	Not detected
48758	108	<30	Not detected
48758	109			48.0121	27.278
48758	115	<30	Not detected
48758	122	<30	Not detected	40.1896	18.772
48758	129	<30	Not detected
48758	136	<30	Not detected	38.5789	15.276
48758	143	<30	Not detected
48758	151	<30	Detected	29.2926	11.0398
48758	157	<30	Detected
48758	164	<30	Detected	24.764	8.20451
48758	171	<30	Detected
48758	178	33
48758	185	388
48758	192	314		18.6168	5.92244	0.09641	0.02347			0.606957	0.213102
48758	202	2560
48758	207	12599
48758	212	41032		13.991	3.42839
48758	220	6443
48758	226	4215		12.0599	2.22426
48758	233	2542
48758	240	2111
48758	247	1676		9.78648	1.18949			0.05912	0.1595			0.5432	0.995441
48758	254	786
48758	261	651
48758	268	354
48758	275	589
48758	282	64
48758	289	381		6.29099	Not Detectable
48758	296	456
48758	300	415
48758	303	909		6.04711	Not Detectable			0.04489	0.11482			0.496985	1.09424
48758	310	161
48758	318	513
48758	324	502
48758	331	615
48758	339	899
48758	345	1618
48758	353	1939
48758	359	2910				0.07904	0.03875	0.05014	0.12887	0.665384	0.263846	0.547115	1.45515
71190	-429	<40	Not detected
71190	-359	<40	Not detected
71190	-355	<40	Not detected
71190	-348	<40	Not detected
71190	-327	<40	Not detected
71190	-257	<40	Not detected
71190	-215	<30	Detected
71190	-201	<30	Not detected
71190	-187	<30	Not detected	Not Detectable	Not Detectable
71190	-172			123.862	161.191
71190	-158	<30	Not detected	88.2047	87.3381
71190	-144	<30	Not detected	58.3633	37.4185
71190	-130	<30	Not detected	50.5004	24.3034
71190	-115	<30	Not detected	35.6954	11.2301
71190	-51	<30	Not detected
71190	-2	<30	Detected	3.64331	Not Detectable
71190	3	<30	Not detected
71190	11	<30	Not detected	101.312	170.968
71190	18	<30	Not detected
71190	24	35		77.0166	86.3766
71190	31	<30	Not detected
71190	38	<30	Detected
71190	39			64.7875	36.7458
71190	45	<30	Not detected
71190	53	65		45.4775	18.9793
71190	59	916
71190	67	6644		35.7594	9.39676
71190	73	1161
71190	81	728		24.2334	5.11853			>50	0.09208			>50	1.46187
71190	87	768
71190	95	162		19.3444	2.83539
71190	106	267		15.7777	2.20443
71190	116	222
71190	122	1231		11.6327	1.07424
71190	129	5876
71190	137	31032		9.63051	0.505289			>50	0.14579			>50	0.699872
71190	144	2980
71190	150	98		7.40173	Not Detectable
71190	158	361
72210	-283	<40	Not detected
72210	-265	<40	Not detected
72210	-245	<40	Not detected
72210	-237	<40	Not detected
72210	-217	<40	Not detected
72210	-168	<40	Not detected
72210	-105	<40	Not detected
72210	-91	<40	Not detected
72210	-77	<40	Not detected	Not Detectable	Not Detectable
72210	-62			147.87	168.974
72210	-48	<30	Not detected	106.388	94.3686
72210	-34	<30	Not detected	73.445	52.8633
72210	-21	<30	Detected	53.7194	32.2545
72210	-2			39.7416	18.7057
72210	-1	<30	Not detected
72210	8	<30	Not detected
72210	21	<48	Not detected
72210	42	<30	Not detected
72210	61	<48	Not detected
72210	76	<48	Not detected
72210	88	<30	Not detected	34.5713	10.5703
72210	95	<30	Not detected
72210	102	<30	Not detected
72210	109	<30	Not detected	22.5022	4.98686
72210	116	<30	Not detected
72210	125	<30	Not detected
72210	131	<30	Not detected	16.2969	2.56584
72210	137	<30	Not detected
72210	144	<30	Not detected
72210	152	<30	Not detected
72210	159	<30	Not detected
72210	162	<30	Not detected	10.434	1.2734
72210	181	1459
72210	186	443
72210	194	822		7.14569	Not Detectable			0.0367	0.08447			0.320336	0.550056
72210	195					0.07194	0.04803			0.605452	0.536532
72210	208	1990
72210	215	1470
72210	228	5060
72210	242	3240
72210	250	1710
72210	251			3.3941	Not Detectable
72210	264	1982
72210	278	5094
72210	292	13179
72210	294	14542		1.8943	Not Detectable	0.06931	0.07312	0.21224	0.14054	0.649196	0.704776	8.02252	1.05066
