# Supplementary material for: Combination immunotherapy induces post-intervention control of HIV
Source: Research Square preprint supplement (doi:10.21203/rs.3.rs-6141479/v1), 2025-03-19
Supplement: Supplementary file 6 [file e6194de22b2fdfe41f183876.docx]

**Table S7:** bNAb population pharmacokinetic (PK) model parameters.

| bNAb | Parameter2,3 | Estimate | S.E.1 | %R.S.E.1 |
| --- | --- | --- | --- | --- |
| 10-1074 | **𝛳** CL | 0.0038 | 0. 00027 | 7.17 |
| **𝛳** V Central | 0.12 | 0.0034 | 2.84 |
| **Ω** CL | 0.22 | 0.049 | 22.5 |
| **𝜎** Proportional Error | 0.37 | 0.022 | 5.95 |
| VRC07-523LS | **𝛳** CL | 0.002 | 0.000084 | 4.12 |
| **𝛳** V Central | 0.1 | 0.0093 | 9.32 |
| **𝛳** Q | 0.0013 | 0.00039 | 31.0 |
| **𝛳** V Peripheral | 0.026 | 0.0047 | 17.9 |
| **Ω** CL | 0.12 | 0.029 | 24.3 |
| **Ω** V Central | 0.2 | 0.082 | 42.2 |
| **𝜎** Proportional Error | 0.14 | 0.0083 | 5.81 |

1. S.E. is the standard error, %R.S.E. is the relative standard error
2. **𝛳**’s are the typical population estimates, **Ω**’s are the estimates for between subject variability and **𝜎**’s are the estimates for residual unexplained variability.
3. Clearance (CL) in L/day/kg, Volume of Distribution (V) in L/kg, Inter-compartmental CL (Q) in L/day/kg
